Version dated: December 15, 2017

1

2 RH: DIVERGENCE-TIME ESTIMATION WITH SNPS

3 **Bayesian Divergence-Time Estimation with**  
4 **Genome-Wide SNP Data of Sea Catfishes (Ariidae)**  
5 **Supports Miocene Closure of the Panamanian Isthmus**

6 MADLEN STANGE<sup>1,2</sup>, MARCELO R. SÁNCHEZ-VILLAGRA<sup>1</sup>, WALTER SALZBURGER<sup>2,3</sup>,  
7 MICHAEL MATSCHINER<sup>2,3</sup>

8 <sup>1</sup>*Department of Palaeontology and Museum, University of Zurich, Karl-Schmid-Strasse 4, 8006*  
9 *Zurich, Switzerland*

10 <sup>2</sup>*Zoological Institute, University of Basel, 4051 Basel, Switzerland*

11 <sup>3</sup>*Centre for Ecological and Evolutionary Synthesis (CEES), Department of Biosciences,*  
12 *University of Oslo, 0316 Oslo, Norway*

13 **Corresponding author:** Madlen Stange, Department of Palaeontology and Museum,

14 University of Zurich, Karl-Schmid-Strasse 4, 8006 Zurich, Switzerland; E-mail:

15 [madlen.stange@pim.uzh.ch](mailto:madlen.stange@pim.uzh.ch); Michael Matschiner, Zoological Institute, University of Basel,

16 Vesalgasse 1, 4051 Basel, Switzerland; Email: [michaelmatschiner@mac.com](mailto:michaelmatschiner@mac.com)

17 *Abstract.*—

18 The closure of the Isthmus of Panama has long been considered to be one of the  
19 best defined biogeographic calibration points for molecular divergence-time estimation.

20 However, geological and biological evidence has recently cast doubt on the presumed

21 timing of the initial isthmus closure around 3 Ma but has instead suggested the existence  
22 of temporary land bridges as early as the Middle or Late Miocene. The biological evidence  
23 supporting these earlier land bridges was based either on only few molecular markers or on  
24 concatenation of genome-wide sequence data, an approach that is known to result in  
25 potentially misleading branch lengths and divergence times, which could compromise the  
26 reliability of this evidence. To allow divergence-time estimation with genomic data using  
27 the more appropriate multi-species coalescent model, we here develop a new method  
28 combining the SNP-based Bayesian species-tree inference of the software SNAPP with a  
29 molecular clock model that can be calibrated with fossil or biogeographic constraints. We  
30 validate our approach with simulations and use our method to reanalyze genomic data of  
31 Neotropical army ants (Dorylinae) that previously supported divergence times of Central  
32 and South American populations before the isthmus closure around 3 Ma. Our reanalysis  
33 with the multi-species coalescent model shifts all of these divergence times to ages younger  
34 than 3 Ma, suggesting that the older estimates supporting the earlier existence of  
35 temporary land bridges were artifacts resulting at least partially from the use of  
36 concatenation. We then apply our method to a new RAD-sequencing data set of  
37 Neotropical sea catfishes (Ariidae) and calibrate their species tree with extensive  
38 information from the fossil record. We identify a series of divergences between groups of  
39 Caribbean and Pacific sea catfishes around 10 Ma, indicating that processes related to the  
40 emergence of the isthmus led to vicariant speciation already in the Late Miocene, millions  
41 of years before the final isthmus closure.

42 (Keywords: Panamanian Isthmus; Central American Seaway; Bayesian inference;  
43 phylogeny; molecular clock; fossil record; SNPs; RAD sequencing; teleosts)

44 The emergence of the Isthmus of Panama had a profound impact on biodiversity in  
45 the Western Hemisphere. On land, the isthmus enabled terrestrial animals to migrate  
46 between the American continents, which led to massive range expansions and local  
47 extinctions during the so-called Great American Biotic Interchange (Woodburne 2010). In  
48 the sea, however, the rise of the isthmus created an impermeable barrier between the  
49 Caribbean and the Tropical Eastern Pacific (TEP), resulting in the geographic separation  
50 of formerly genetically connected marine populations (Lessios 2008). Due to its presumed  
51 simultaneous impact on speciation events in numerous terrestrial and marine lineages, the  
52 closure of the Isthmus of Panama has been considered one of the best biogeographic  
53 calibration points for molecular divergence-time estimation and has been used in several  
54 hundreds of phylogenetic studies (Bermingham et al. 1997; Lessios 2008; Bacon et al.  
55 2015a). The precise age of isthmus closure assumed in these studies varies but generally  
56 lies between 3.5 Ma (e.g. Donaldson and Wilson Jr 1999) and 2.8 Ma (e.g. Betancur-R.  
57 et al. 2012), according to evidence from marine records of isotopes, salinity, and  
58 temperature, that all support an age in this range (Jackson and O’Dea 2013; Coates and  
59 Stallard 2013; O’Dea et al. 2016).

60 However, recent research has indicated that the history of the isthmus may be more  
61 complex than previously thought and that the isthmus may have closed temporarily  
62 millions of years before its final establishment around 3 Ma. The collision between the  
63 Panama Arc and the South American plate, which initiated the development of the  
64 isthmus, began as early as 25-23 Ma according to geochemical evidence (Farris et al. 2011).  
65 As a consequence, the Central American Seaway (CAS), the deep oceanic seaway  
66 connecting the West Atlantic and the East Pacific through the Atrato strait, is  
67 hypothesized to have narrowed down to a width of 200 km, still allowing for continued  
68 exchange between the oceans at this time (Farris et al. 2011; Montes et al. 2012). It has  
69 been argued that Eocene zircons in Colombian sediments support the existence of Miocene

70 land bridges and fluvial connections between Panama and South America and thus a  
71 closure of the CAS around 15-13 Ma (Montes et al. 2015); however, alternative  
72 explanations for the occurrence of these zircons may be possible (O’Dea et al. 2016).  
73 Gradual shoaling of the CAS around 11-10 Ma has also been supported by biostratigraphic  
74 and paleobathymetric analyses (Coates et al. 2004) as well as seawater isotopic records  
75 (Sepulchre et al. 2014). On the other hand, a separate analysis of the seawater isotope  
76 records indicated that deep-water connections existed until around 7 Ma, followed by  
77 mostly uninterrupted shallow-water exchange (Osborne et al. 2014).

78 While the Atrato strait represented the main connection between the Caribbean  
79 and the Pacific throughout most of the Miocene, other passageways existed in the Panama  
80 Canal basin (the Panama isthmian strait) and across Nicaragua (the San Carlos strait)  
81 (Savin and Douglas 1985). Both of these passageways were likely closed around 8 Ma (and  
82 possibly earlier) but reopened around 6 Ma with a depth greater than 200 m, according to  
83 evidence from fossil foraminifera (Collins et al. 1996). The last connection between the  
84 Caribbean and the Pacific likely closed around 2.8 Ma (O’Dea et al. 2016), but short-lived  
85 breachings induced by sea-level fluctuations as late as 2.45 Ma cannot be excluded and  
86 receive some support from molecular data (Groeneveld et al. 2014; Hickerson et al. 2006).

87 In agreement with the putative existence of earlier land bridges, Miocene dispersal  
88 of terrestrial animals between North and South America is well documented in the fossil  
89 record. Fossils of a New World monkey, discovered in the Panama Canal basin,  
90 demonstrate that primates had arrived on the North American landmass before 20.9 Ma  
91 (Bloch et al. 2016). Furthermore, fossils of xenarthran mammals derived from South  
92 America (ground sloths, glyptodonts, and pampatheriids) were found in Late Miocene (9-8  
93 Ma) deposits in Florida (Hirschfeld 1968; Laurito and Valerio 2012) and in Early Pliocene  
94 (4.8-4.7 Ma) deposits in Mexico (Carranza-Castañeda and Miller 2004; Flynn et al. 2005),  
95 and Argentinian fossils of the procyonid carnivore *Cyonasua* provide evidence that

96 terrestrial mammals had also crossed from North to South America before 7 Ma (Marshall  
97 1988; Bacon et al. 2016). The Argentinian fossils could still be predated by fossils of other  
98 mammalian North American immigrants in Late Miocene Amazonian deposits (Campbell  
99 et al. 2010; Frailey and Campbell 2012; Prothero et al. 2014); however, their age estimate  
100 of 9 Ma may require further confirmation (Carrillo et al. 2015). Dispersal of terrestrial  
101 animals is also supported by molecular data. Based on a metaanalysis of phylogenetic data  
102 sets, Bacon et al. (2015a,b) reported major increases in migration rates around 10-7 Ma  
103 and at 6-5 Ma. In combination with molecular evidence for increased vicariance of marine  
104 organisms around 10-9 Ma, the authors concluded that the Isthmus of Panama emerged  
105 millions of years earlier than commonly assumed.

106         Unfortunately, the observed evidence for dispersal of terrestrial organisms is in most  
107 cases insufficient for conclusions about the existence of earlier land bridges. This is due to  
108 the fact that most of these organisms are members of groups with a known capacity of  
109 oceanic dispersal (de Queiroz 2014), in many cases even over far greater distances than the  
110 gap remaining between North and South America in the Miocene (< 600 km; Farris et al.  
111 2011). Before their dispersal to the North American landmass in the Early Miocene,  
112 primates had already crossed the Atlantic in the Eocene, when they arrived in South  
113 America (Kay 2015; Bloch et al. 2016). Many other mammal lineages have proven capable  
114 of oversea dispersal, which may be best illustrated by the rich mammalian fauna of  
115 Madagascar that is largely derived from Africa even though the two landmasses separated  
116 around 120 Ma (Ali and Huber 2010).

117         As a notable exception without the capacity of oversea dispersal, Winston et al.  
118 (2017) recently used Neotropical army ants (Dorylinae) to investigate the potential earlier  
119 existence of land bridges between North and South America. With wingless queens and  
120 workers that can only travel on dry ground, army ant colonies are highly unlikely to  
121 disperse across any larger water bodies (Winston et al. 2017) and are therefore particularly

122 suited to answer this question. Based on restriction-site associated DNA sequencing  
123 (RAD-seq) and a concatenated alignment of genome-wide RAD-seq loci, Winston et al.  
124 (2017) generated a time-calibrated phylogeny that supported migration from South to  
125 Central America prior to 3 Ma for populations of the four species *Eciton burchellii* (4.3  
126 Ma), *E. vagans* (5.5 Ma), *E. lucanoides* (6.4 Ma), and *E. mexicanum* (6.6 Ma). These  
127 estimates appear to support the existence of earlier land bridges; however, the results  
128 might be compromised by the fact that concatenation was used for phylogenetic inference.  
129 In the presence of incomplete lineage sorting, concatenation has not only been shown to be  
130 statistically inconsistent, with a tendency to inflate support values (Kubatko and Degnan  
131 2007; Roch and Steel 2014; Linkem et al. 2016), but studies based on empirical as well as  
132 simulated data have also highlighted that concatenation may lead to branch-length bias  
133 and potentially misleading age estimates, particularly for younger divergence times  
134 (McCormack et al. 2011; Angelis and dos Reis 2015; Mendes and Hahn 2016; Meyer et al.  
135 2017; Ogilvie et al. 2016, 2017).

136 A better alternative for more accurate estimates of divergence times related to the  
137 isthmus closure is the multi-species coalescent (MSC) model (Maddison 1997; Ogilvie et al.  
138 2016, 2017). While the MSC also does not account for processes like introgression or gene  
139 duplication, it incorporates incomplete lineage sorting, which is likely the most prevalent  
140 cause of gene-tree heterogeneity in rapidly diverging lineages (Hobolth et al. 2007; Scally  
141 et al. 2012; Suh et al. 2015; Edwards et al. 2016). Unfortunately, available software  
142 implementing the MSC model either does not allow time calibration with absolute node-age  
143 constraints (Rannala and Yang 2003; Liu 2008; Kubatko et al. 2009; Liu et al. 2010; Bryant  
144 et al. 2012; Chifman and Kubatko 2014; Mirarab and Warnow 2015) or is computationally  
145 too demanding to be applied to genome-wide data (Heled and Drummond 2010; Ogilvie  
146 et al. 2017). To fill this gap in the available methodology, we here develop a new approach  
147 combining the Bayesian species-tree inference of the software SNAPP (Bryant et al. 2012)

148 with a molecular clock model that can be calibrated with fossil or biogeographic  
149 constraints. SNAPP is well suited for analyses of genome-wide data as it infers the species  
150 tree directly from single-nucleotide polymorphisms (SNPs), through integration over all  
151 possible gene trees on the basis of the MSC model. By using SNPs as markers, SNAPP  
152 avoids the issue of within-locus recombination, a common model violation for almost all  
153 other implementations of the MSC (Lanier and Knowles 2012; Gatesy and Springer 2013,  
154 2014; Springer and Gatesy 2016; Edwards et al. 2016; Scornavacca and Galtier 2017).  
155 SNAPP has been used in close to 100 studies (Supplementary Table S1), but with few  
156 exceptions, none of these studies inferred absolute divergence times. In five studies that  
157 estimated divergence times (Lischer et al. 2014; Demos et al. 2015; Ru et al. 2016; Portik  
158 et al. 2017; Cooper and Uy 2017), branch lengths were converted *a posteriori* to absolute  
159 times on the basis of an assumed mutation rate for the SNP set, a practice that should be  
160 taken with caution due to ascertainment bias (Lozier et al. 2016, also see the results of this  
161 study). With the possibility to analyze thousands of markers simultaneously, SNAPP  
162 nevertheless promises high precision in relative branch-length estimates, and accurate  
163 absolute divergence times when properly calibrated with fossil or biogeographic evidence.

164 We evaluate the accuracy and precision of our approach using an extensive set of  
165 simulations, and we compare it to divergence-time estimation based on concatenation. We  
166 then apply our method to reanalyze genomic data of Neotropical army ants with the MSC  
167 model, and we use it to estimate divergence times of Neotropical sea catfishes (Ariidae)  
168 based on newly generated RAD-seq data. Sea catfishes include species endemic to the TEP  
169 as well as Caribbean species in several genera. They inhabit coastal brackish and marine  
170 habitats down to a depth of around 30 m (Cervigón et al. 1993) and are restricted in  
171 dispersal by demersal lifestyle and male mouthbrooding. Sea catfishes are thus directly  
172 affected by geographic changes of the coast line, which makes them ideally suited to inform  
173 about vicariance processes related to the emergence of the Isthmus of Panama.

## BAYESIAN DIVERGENCE-TIME ESTIMATION WITH SIMULATED SNP DATA

We designed five experiments based on simulated data to thoroughly test the performance of the MSC model implemented in SNAPP as a tool for divergence-time estimation with SNP data. In experiment 1, we tested the accuracy and precision of divergence times estimated with SNAPP and the degree to which these are influenced by the size of the SNP data set and the placement of node-age constraints. In experiment 2 we assessed the effect of larger population sizes, and in experiment 3 we tested how the precision of estimates depends on the number of individuals sampled per species. In experiment 4, we further evaluated SNAPP's estimates of divergence times, the molecular clock rate, and the population size, based on data sets that include or exclude invariant sites, with or without ascertainment-bias correction. Finally, in experiment 5, we compared divergence-time estimates based on the MSC model implemented in SNAPP with those inferred with concatenated data using BEAST (Bouckaert et al. 2014). Characteristics of all simulated data sets are summarized in Table 1. Based on the results of experiments 1-5, we developed recommendations for divergence-time estimation with SNP data, and we then applied this approach to infer timelines of evolution for Neotropical army ants and sea catfishes.

### *Simulating Genome-Wide SNP Data*

All simulation parameters, including the number of extant species, the age of the species tree, the population size, the generation time, the mutation rate, and the number of loci per data set were chosen to be roughly similar to those expected in empirical analyses with the software SNAPP (Supplementary Table S1). All simulated data sets were based on the same set of 100 species trees generated with the pure-birth Yule process (Yule 1925)



Table 1: Simulated data sets and analysis settings used in experiments 1-5.

| $N$     | Samples | SNPs  | Invar. sites | Asc. bias     | Calibration | Model (implementation) | Ex. |
|---------|---------|-------|--------------|---------------|-------------|------------------------|-----|
| 25 000  | 2       | 300   | excluded     | corrected     | root node   | MSC (SNAPP)            | 1   |
| 25 000  | 2       | 1 000 | excluded     | corrected     | root node   | MSC (SNAPP)            | 1-5 |
| 25 000  | 2       | 3 000 | excluded     | corrected     | root node   | MSC (SNAPP)            | 1   |
| 25 000  | 2       | 300   | excluded     | corrected     | young node  | MSC (SNAPP)            | 1   |
| 25 000  | 2       | 1 000 | excluded     | corrected     | young node  | MSC (SNAPP)            | 1,5 |
| 25 000  | 2       | 3 000 | excluded     | corrected     | young node  | MSC (SNAPP)            | 1   |
| 100 000 | 2       | 1 000 | excluded     | corrected     | root node   | MSC (SNAPP)            | 2,5 |
| 400 000 | 2       | 1 000 | excluded     | corrected     | root node   | MSC (SNAPP)            | 2,5 |
| 25 000  | 1       | 1 000 | excluded     | corrected     | root node   | MSC (SNAPP)            | 3   |
| 25 000  | 4       | 1 000 | excluded     | corrected     | root node   | MSC (SNAPP)            | 3   |
| 25 000  | 2       | 1 000 | excluded     | not corrected | root node   | MSC (SNAPP)            | 4   |
| 25 000  | 2       | 1 000 | included     | not present   | root node   | MSC (SNAPP)            | 4   |
| 25 000  | 2       | 1 000 | included     | not present   | root node   | concatenation (BEAST)  | 5   |
| 25 000  | 2       | 1 000 | included     | not present   | young node  | concatenation (BEAST)  | 5   |
| 100 000 | 2       | 1 000 | included     | not present   | root node   | concatenation (BEAST)  | 5   |
| 400 000 | 2       | 1 000 | included     | not present   | root node   | concatenation (BEAST)  | 5   |

*Notes:* The population size  $N$  is the number of diploid individuals simulated. The number of samples refers to the number of diploid individuals sampled for each of the 20 simulated species. Invar. = Invariant; Asc. = Ascertainment; Ex. = Experiment.

198 (which is also the only tree prior currently available in SNAPP). Ultrametric species trees  
 199 conditioned to have 20 extant species were generated with branch lengths in units of  
 200 generations, using a constant speciation rate  $\lambda = 4 \times 10^{-7}$  species/generation. Assuming a  
 201 generation time of 5 years, this speciation rate translates to  $\lambda = 0.08$  species/myr, within  
 202 the range of speciation rates observed in rapidly radiating vertebrate clades (Alfaro et al.  
 203 2009; Rabosky et al. 2013). The ages of the resulting species trees ranged from 2.8 to 12.7  
 204 (mean: 6.5) million generations or from 14.2 and 63.6 (mean: 32.3) myr, again assuming  
 205 the same generation time of 5 years.

206 For each simulated species tree, 10 000 gene trees were generated with the Python  
 207 library DendroPy (Sukumaran and Holder 2010), using constant and equal population sizes  
 208 for all branches. These population sizes were set to  $N = 25\,000$  diploid individuals for most  
 209 analyses, but we also used the larger population sizes  $N = 100\,000$  and  $N = 400\,000$  in the  
 210 simulations conducted for experiment 2 (Table 1). For each simulated gene tree, between 2,

211 4, or 8 terminal lineages were sampled per species, corresponding to 1, 2, or 4 diploid  
212 individuals per species (Table 1). Exemplary gene trees are shown in Supplementary Figure  
213 S1. Sequences with a length of 200 bp were then simulated along each of the gene trees  
214 with the software Seq-Gen (Rambaut and Grassly 1997), according to the Jukes-Cantor  
215 model of sequence evolution (Jukes and Cantor 1969) and a rate of  $10^{-9}$  mutations per site  
216 per generation or  $2 \times 10^{-4}$  mutations per site per myr. The expected number of mutations  
217 per site between two individuals of a panmictic population,  $\Theta$ , can be calculated as  
218  $\Theta = 4N\mu$ , where  $N$  is the number of diploid individuals, or half the number of haploid  
219 individuals, and  $\mu$  is the mutation rate per site per generation. With the settings used in  
220 most of our simulations ( $N = 25\,000$ ;  $\mu = 10^{-9}$ ), the expected number of mutations per site  
221 between two individuals of the same population is therefore  $\Theta = 4 \times 25\,000 \times 10^{-9} = 10^{-4}$ .

222 At least 9 965 (mean: 9 998.5) of the resulting 10 000 alignments per species tree  
223 contained one or more variable sites. A single SNP was selected at random from all except  
224 completely invariable alignments to generate data sets of close to 10 000 unlinked SNPs for  
225 each of the 100 species trees. For each species, alleles of the 2, 4, or 8 terminal lineages  
226 sampled from each gene tree were combined randomly to form 1, 2, or 4 diploid  
227 individuals, which resulted in mean heterozygosities between 0.0012 and 0.0255. The  
228 resulting data sets of close to 10 000 unlinked SNPs were further subsampled randomly to  
229 generate sets of 300, 1 000, and 3 000 bi-allelic SNPs for each species tree (see Table 1).

230 For the analyses in experiments 1-4, each of the 100 data sets of 300, 1 000, and  
231 3 000 SNPs was translated into the format required for SNAPP, where heterozygous sites  
232 are coded with “1” and homozygous sites are coded as “0” and “2”. Per site, the codes “0”  
233 and “2” were randomly assigned to one of the two alleles to ensure that the frequencies of  
234 these codes were nearly identical in each data set. For experiment 4 in which we tested for  
235 the effect of ascertainment bias in SNAPP analyses, the data sets of 1 000 SNPs were also  
236 modified by adding invariant sites. To each set of 1 000 SNPs, between 12 184 and 32 740

237 invariant sites (alternating “0” and “2”) were added so that the proportion of SNPs in  
238 these data sets matched the mean proportion of variable sites in the alignments initially  
239 generated for the respective species tree. Finally, for analyses using concatenation in  
240 experiment 5, we added the same numbers of invariant sites to the data sets of 1 000 SNPs;  
241 however, in this case we used the untranslated versions of these data sets with the original  
242 nucleotide code, and also used nucleotide code for the added invariant sites (randomly  
243 selecting “A” , “C”, “G”, or “T” at each site).

### 244 *Inferring Divergence Times from Simulated SNP Data*

245 Input data and analysis settings were specified in the XML format used by SNAPP  
246 (Drummond and Bouckaert 2015); however, several important modifications were made to  
247 the standard analysis settings to allow divergence-time estimation with SNAPP. First, the  
248 forward and reverse mutation-rate parameters were both fixed to 1.0. By doing so, we  
249 assume a symmetric substitution model as well as equal frequencies, which is justified given  
250 that homozygous nucleotide alleles were translated into the codes “0” and “2” at random,  
251 independently at each site.

252 Second, we added a parameter for the rate of a strict molecular clock, the only clock  
253 model currently supported by SNAPP, and we used the one-on-x prior (Drummond and  
254 Bouckaert 2015) for the clock rate. Even though the one-on-x prior is improper (it does  
255 not integrate to unity), it is well-suited as a default rate prior because it combines the  
256 favorable attributes of i) giving preference to smaller values and ii) being invariant under  
257 scale transformations (Drummond et al. 2002). This means that regardless of the time  
258 scales spanned by the phylogeny of the investigated group, a relative change in the rate  
259 estimate (e.g. a multiplication by two) will always lead to the same relative change in the  
260 prior probability (e.g. a division in half). Thus, the one-on-x prior can be applied equally  
261 in analyses of groups with high or low mutation rates. However, it should be noted that

262 because the one-on-x prior is improper, it is not suitable for model comparison based on  
263 estimates of the marginal likelihood. If such analyses were to be combined with  
264 divergence-time estimation in SNAPP, the one-on-x prior should be replaced with a  
265 suitable proper prior distribution.

266         The molecular clock rate was calibrated through age constraints on a single node of  
267 the species tree. To compare the effects of old and young calibrations, we conducted  
268 separate sets of analyses in which we placed this age constraint either on the root node or  
269 on the node with an age closest to one third of the root age (see Table 1). In each case,  
270 calibration nodes were constrained with log-normal calibration densities centered on the  
271 true node age. Specifically, these calibration densities were parameterized with an offset of  
272 half the true node age, a mean (in real space) of half the true node age, and a standard  
273 deviation of the log-transformed distribution of 0.1.

274         Third, initial tests indicated that our simulated data sets contained very little  
275 information about the ancestral population sizes on internal branches of the species tree,  
276 and that unreliable estimation of these population sizes could confound divergence-time  
277 estimates. We therefore decided not to estimate the population-size parameter  $\Theta$   
278 individually for each branch as is usually done in SNAPP analyses, but instead to estimate  
279 just a single value of  $\Theta$  for all branches, assuming equal population sizes in all species.  
280 This assumption was met in our simulated data sets but may often be violated by  
281 empirical data sets; we turn to the implications of this violation in the Discussion. As a  
282 prior on  $\Theta$ , we selected a uniform prior distribution, the only scale-invariant prior available  
283 for this parameter in SNAPP.

284         Finally, as we were interested in SNAPP's ability to infer divergence times rather  
285 than the species-tree topology (which has been demonstrated previously; Bryant et al.  
286 2012), we fixed the species-tree topology to the true topology. We provide a script written  
287 in Ruby, "snapp\_prep.rb", to generate XML input files for SNAPP corresponding to the

288 settings described above (with or without a fixed species tree). Note that these settings,  
289 including the use of scale-invariant prior distributions, were deliberately not tailored  
290 towards our simulated data sets, but were instead intended to be generally applicable for  
291 divergence-time estimation with any SNP data set. As a result, the XML files produced by  
292 our script should be suitable for analysis without requiring further adjustments from the  
293 user. Our script is freely available at [https://github.com/mmatschiner/snapp\\_prep](https://github.com/mmatschiner/snapp_prep).  
294 Details on operators used in our analyses are provided in Supplementary Text S1.

295 As SNAPP is specifically designed for the analysis of bi-allelic SNPs, its algorithm  
296 explicitly accounts for ascertainment bias introduced by the exclusion of invariable sites  
297 (Bryant et al. 2012; RoyChoudhury and Thompson 2012). Nevertheless, SNAPP allows  
298 invariant sites in the data set and the user may specify whether or not these have been  
299 excluded. Accordingly, we allow for invariant sites in all analyses of experiments 1-3, but  
300 not for the analyses of experiment 4 in which either ascertainment bias was not corrected  
301 for or invariant sites were added to data sets of 1 000 SNPs (see Table 1). This option did  
302 not apply to the analyses of concatenated data in experiment 5 as these were not  
303 conducted with SNAPP. As a substitution model, we applied the HKY model (Hasegawa  
304 et al. 1985) in analyses of concatenated data.

305 All XML files were analyzed using BEAST v.2.3.0 (Bouckaert et al. 2014) either  
306 with the SNAPP package v.1.3.0 (all analyses of experiments 1-4) or without additional  
307 packages (analyses of concatenated data sets in experiment 5). We performed between  
308 400 000 and 18.4 million Markov-chain Monte Carlo (MCMC) iterations per SNAPP  
309 analysis and 500 000 iterations per concatenation analysis (Supplementary Table S2).  
310 Stationarity of MCMC chains was assessed by calculating effective samples sizes (ESS) for  
311 all parameters after discarding the first 10% of the chain as burn-in. Details on  
312 computational requirements of SNAPP analyses are given in Supplementary Text S2.

313 *Results: Precision and Accuracy of Parameter Estimates Based on*  
 314 *Simulated SNPs*

315 *Experiment 1.*— In experiment 1, we tested the effects of data-set size and calibration  
 316 placement on node-age estimates. A comparison of true and estimated node ages, for  
 317 analyses of 100 data sets of 300, 1 000, and 3 000 SNPs with node-age constraints on either  
 318 the root or a younger node, is shown in Figure 1 and summarized in Table 2. As measured  
 319 by the width of 95% highest posterior density (HPD) intervals, precision was generally  
 320 greater for younger nodes and increased when larger numbers of SNPs were used for the  
 321 analysis. In all sets of analyses, over 95% of the 95% HPD intervals contained the true age  
 322 of the node, indicative of accurate inference free of node-age bias (Heath et al. 2014;  
 323 Gavryushkina et al. 2014; Matschiner et al. 2017). The percentage of 95% HPD intervals  
 324 containing the true node age was always slightly higher in analyses with root-node  
 325 constraints even though the width of these HPD intervals was generally smaller.

Table 2: Accuracy and precision of node-age estimates (experiments 1-3).

| N       | Samples | SNPs  | Calibration | Accuracy (%) |           |      | Precision (myr) |           |      | Ex. |
|---------|---------|-------|-------------|--------------|-----------|------|-----------------|-----------|------|-----|
|         |         |       |             | Young nodes  | Old nodes | All  | Young nodes     | Old nodes | All  |     |
| 25 000  | 2       | 300   | root node   | 95.3         | 97.2      | 96.1 | 3.89            | 7.73      | 5.46 | 1   |
| 25 000  | 2       | 1 000 | root node   | 96.4         | 97.9      | 97.1 | 2.27            | 5.50      | 3.59 | 1-3 |
| 25 000  | 2       | 3 000 | root node   | 96.4         | 99.6      | 97.7 | 1.50            | 4.47      | 2.71 | 1   |
| 25 000  | 2       | 300   | young node  | 95.4         | 96.6      | 95.9 | 4.10            | 12.19     | 7.40 | 1   |
| 25 000  | 2       | 1 000 | young node  | 96.2         | 97.2      | 96.6 | 2.44            | 7.85      | 4.65 | 1   |
| 25 000  | 2       | 3 000 | young node  | 96.1         | 99.5      | 97.5 | 1.57            | 5.48      | 3.17 | 1   |
| 100 000 | 2       | 1 000 | root node   | 95.2         | 98.3      | 96.5 | 2.28            | 5.67      | 3.66 | 2   |
| 400 000 | 2       | 1 000 | root node   | 95.2         | 97.2      | 96.0 | 2.31            | 5.95      | 3.80 | 2   |
| 25 000  | 1       | 1 000 | root node   | 95.9         | 98.7      | 97.1 | 2.28            | 5.46      | 3.58 | 3   |
| 25 000  | 4       | 1 000 | root node   | 94.8         | 97.4      | 95.8 | 2.26            | 5.45      | 3.56 | 3   |

*Notes:* Accuracy was measured as the percentage of 95% HPD intervals containing the true node age. Precision was measured as the mean width of 95% HPD intervals for node-age estimates. Both measures are presented separately for young (true node age < 10 myr) and old (true node age > 10 myr) nodes. Ex. = Experiment.

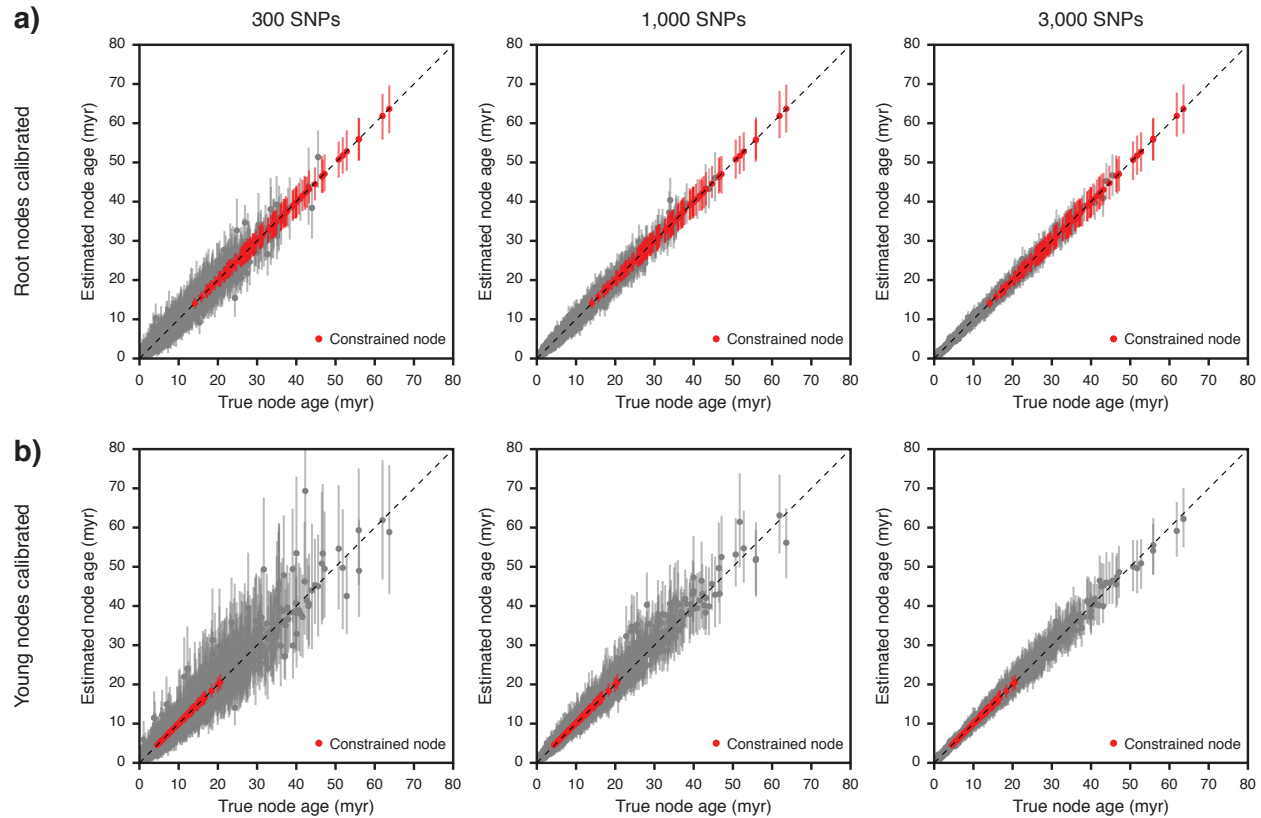

Figure 1: Comparison of true and estimated node ages (experiment 1).

Results are based on 100 species trees and 300 to 3000 SNPs generated per species tree. a) Node ages estimated with an age constraint on the root. b) Node ages estimated with an age constraint on a node that is approximately a third as old as the root. Mean age estimates of constrained and unconstrained nodes are marked with red and gray circles, respectively, and vertical bars indicate 95% HPD intervals.

326 *Experiment 2.*— In experiment 2, we assessed the degree to which node-age estimates  
327 depend on the population sizes used in simulations. A comparison of node-age estimates  
328 obtained with simulated population sizes of  $N = 25\,000$ ,  $N = 100\,000$ , and  $N = 400\,000$   
329 diploid individuals is shown in Supplementary Figure S2 and a summary of the accuracy  
330 and precision of these estimates is included in Table 2. The difference in the population  
331 sizes had only a negligible effect on node-age estimates: With all three population sizes,  
332 between 96.0 and 97.1% of 95% HPD intervals contained the true node age. The mean  
333 width of these intervals increased slightly from 3.59 myr with  $N = 25\,000$  to 3.80 myr with

334  $N = 400\,000$ . While the difference in node-age estimates was minor, computational run  
335 times were significantly longer for analyses with larger population sizes (Supplementary  
336 Text S2, Supplementary Figure S3, and Supplementary Table S2).

337 *Experiment 3.*— In experiment 3, we compared node-age estimates resulting from different  
338 numbers of individuals sampled from each species. The results for this comparison are  
339 shown in Supplementary Figure S4 and summary statistics are included in Table 2. With  
340 sample sizes of 1, 2, or 4 diploid individuals per species, the percentage of 95% HPD  
341 intervals containing the true node age remained between 95.8 and 97.1%, indicating  
342 accurate inference. The mean width of these intervals also remained mostly unchanged,  
343 between 3.56 and 3.59 myr (Table 2). In contrast, computational run times required for  
344 convergence were substantially longer with larger sample sizes: When a single diploid  
345 individual was sampled per species, MCMC analyses converged on average after 4.5 hours  
346 but required on average over 200 hours for convergence with a sample size of four  
347 individuals (Supplementary Text S2, Supplementary Figure S3, and Supplementary Table  
348 S2).

349 *Experiment 4.*— In experiment 4, we tested SNAPP's ability to recover the true clock rate,  
350 the true value of  $\Theta$ , and the true population size when invariant sites were excluded from  
351 the data sets so that these consisted only of SNPs (as was the case for all data sets used in  
352 experiments 1-3). Regardless of whether SNAPP's ascertainment-bias correction was used  
353 or not, the clock rates and  $\Theta$  values estimated from data sets without invariant sites did  
354 not match the settings used for simulations (clock rate =  $2 \times 10^{-4}$  mutations per site per  
355 myr;  $\Theta = 10^{-4}$ ; see above) (Fig. 2a,b, Table 3). While both parameters were  
356 underestimated roughly by a factor of three when ascertainment bias was corrected for,  
357 leaving this bias unaccounted led to parameter overestimation by more than an order of  
358 magnitude. Importantly, however, when ascertainment bias was accounted for, the



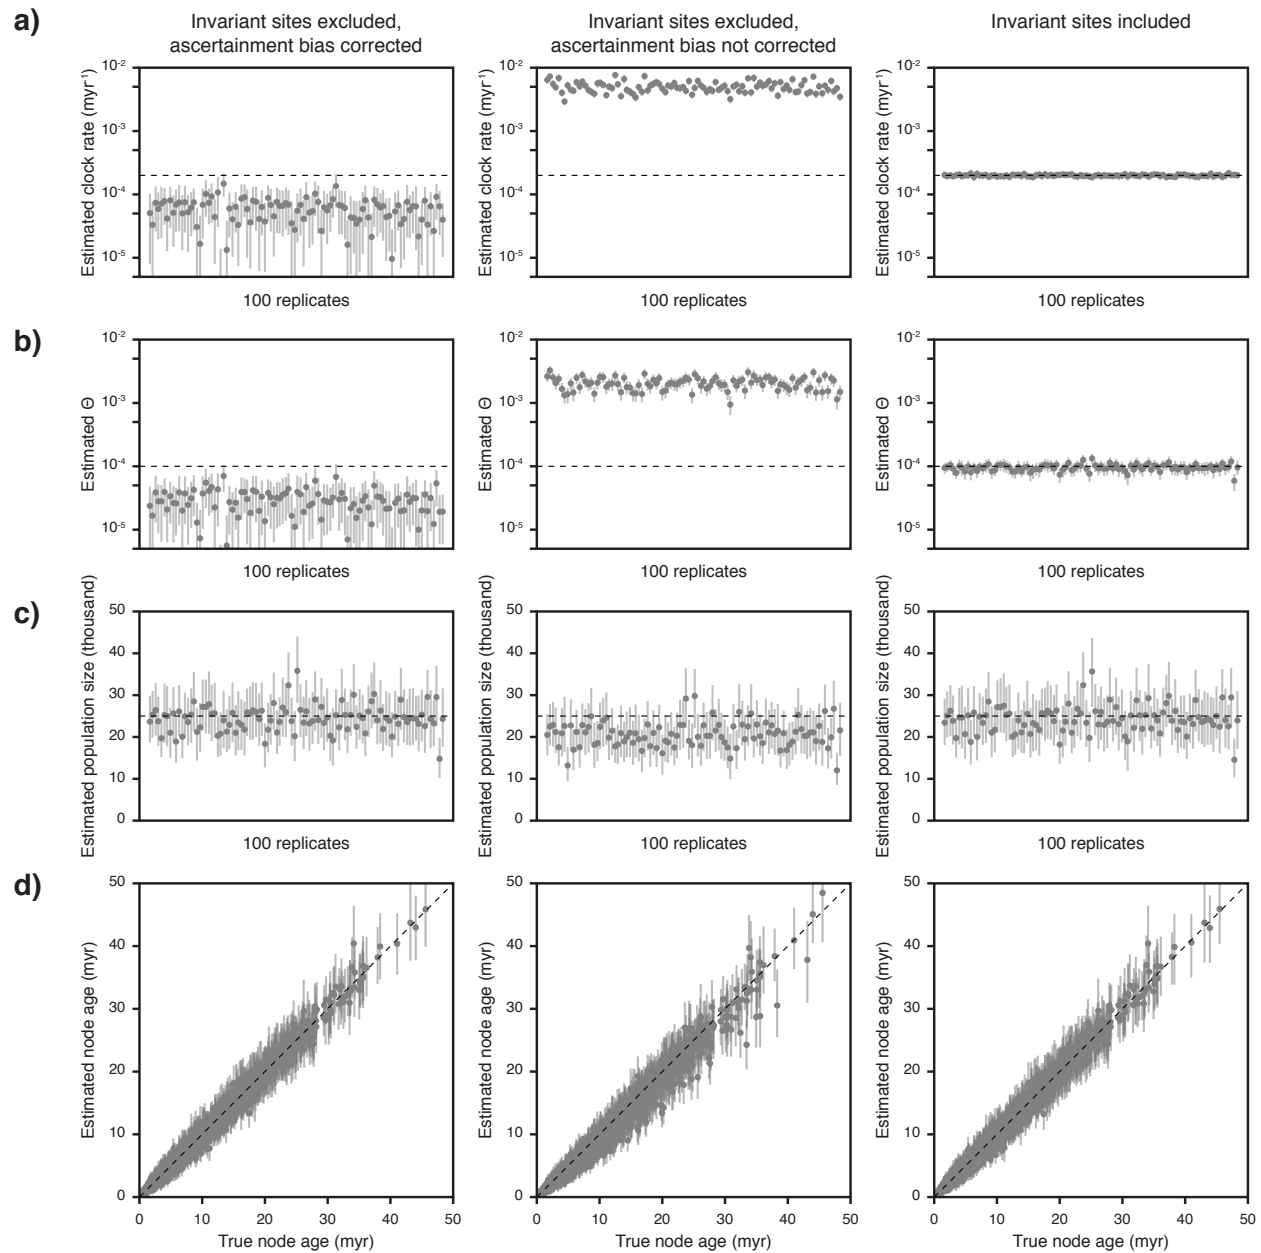

Figure 2: Estimates of node ages, the clock rate,  $\Theta$ , and the population size, with and without ascertainment bias (experiment 4).

Results are based on data sets of 1 000 SNPs generated for each of 100 species trees, analyzed with and without SNAPP's ascertainment-bias correction or after adding invariant sites to the data sets. Gray circles indicate mean estimates and 95% HPD intervals are marked with vertical bars. The visualization of node-age estimates in a) is equivalent to the illustration in Fig. 1, except that only unconstrained nodes are shown. Note that logarithmic scales are used for estimates of the clock rate (a) and  $\Theta$  (b).

359 resulting estimates of the population size  $N$  (calculated as  $N = \Theta/4\mu$  with  $\mu$  being the  
 360 mutation rate per generation, i.e., the estimated clock rate divided by the number of  
 361 generations per myr) accurately recovered the true population size used for simulations  
 362 ( $N = 25\,000$  in all simulations conducted for experiment 4; see Table 1), as 95% of the 95%  
 363 HPD intervals included the true parameter value (Fig. 2c, Table 3). In contrast, the  
 364 population size was underestimated when ascertainment bias was not corrected for: Mean  
 365 estimates were on average 17.4% lower than the true population size and 35% of the 95%  
 366 HPD intervals did not include the true parameter value (Fig. 2c, Table 3).

367 Our results of experiment 4 also showed that when invariant sites were excluded,  
 368 SNAPP’s ascertainment-bias correction was required for the accurate estimation of node  
 369 ages. Without ascertainment-bias correction, only 86.6% of the 95% HPD intervals  
 370 contained the true node age (Fig. 2d, Table 3). Of the 13.4% of 95% HPD intervals that  
 371 did not contain the true node age, almost all (13.2%) were younger than the true node age,  
 372 indicating a tendency to underestimate node ages when ascertainment bias is not taken  
 373 into account.

374 Instead of accounting for ascertainment bias, the inclusion of invariant sites also  
 375 allowed the accurate estimation of the clock rate, the  $\Theta$ -value, and the population size,  
 376 with 100%, 90%, and 94% of the 95% HPD intervals containing the true values of these  
 377 parameters, respectively (Fig. 2a-c, Table 3). Furthermore, the true node ages were also

Table 3: Estimates of clock rate,  $\Theta$ , and the population size, in analyses of data sets with and without ascertainment bias (experiment 4).

| Inv. sites | Asc. bias     | Mean estimate         |                       |        | Accuracy (%) |          |     |
|------------|---------------|-----------------------|-----------------------|--------|--------------|----------|-----|
|            |               | Clock rate            | $\Theta$              | $N$    | Clock rate   | $\Theta$ | $N$ |
| excluded   | corrected     | $5.93 \times 10^{-5}$ | $2.89 \times 10^{-5}$ | 24 438 | 2            | 2        | 95  |
| excluded   | not corrected | $5.02 \times 10^{-3}$ | $2.05 \times 10^{-3}$ | 20 644 | 0            | 0        | 65  |
| included   | not present   | $1.99 \times 10^{-4}$ | $9.59 \times 10^{-5}$ | 24 226 | 100          | 90       | 94  |

*Notes:* The clock rate is given as mutations per site per myr. Inv. = Invariant; Asc. = Ascertainment.

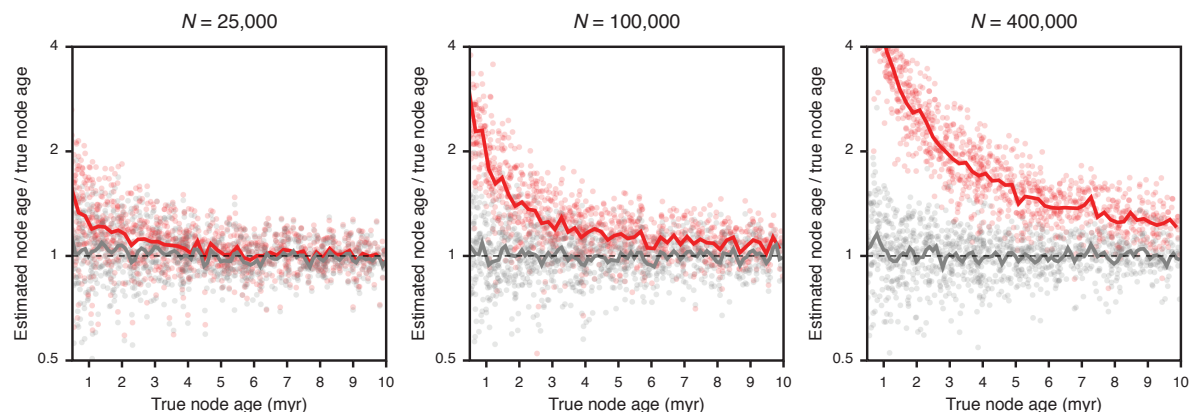

Figure 3: Error in node-age estimates obtained with the MSC or with concatenation (experiment 5).

Results are based on analyses of 100 data sets of 1 000 SNPs, simulated with population sizes  $N = 25\,000$ ,  $N = 100\,000$ , and  $N = 400\,000$ . Gray and red dots indicate node-age estimates obtained with the MSC implemented in SNAPP and with BEAST analyses of concatenated data, respectively. Node-age error is measured as the ratio of the estimated node age over the true node age. Solid lines represent mean node-age errors in bins of 0.2 myr. Only nodes with true ages up to 10 myr are shown to highlight differences between the two methods. Note that a logarithmic scale is used for node-age error.

378 recovered reliably in these analyses and were included in 97.2% of the 95% HPD intervals  
379 (Fig. 2d).

380 *Experiment 5.*— In experiment 5, we compared node-age errors resulting from analyses  
381 with the MSC and with concatenation. This comparison indicated that both methods  
382 perform equally well for older nodes; however, the ages of younger nodes are commonly  
383 overestimated when concatenation is used. The degree of this overestimation increases with  
384 the population size: With a population size of  $N = 25\,000$ , the ages of young nodes with a  
385 true node age between 0.5 myr and 10 myr were on average misestimated by 16.1% when  
386 using concatenation, but this percentage increased to 35.6% and 116.6% with the larger  
387 population sizes of  $N = 100\,000$  and  $N = 400\,000$ , respectively (Fig. 3, Table 4). In  
388 contrast, the degree of misestimation of young node ages was not affected by population  
389 sizes when the MSC was used, and remained between 12.7% and 14.8%. With

Table 4: Mean error in node-age estimates in analyses using the MSC or concatenation, given in percent deviation from the true node age (experiment 5).

| $N$     | Calibration | Model (implementation) | Node-age error (%) |           |      |
|---------|-------------|------------------------|--------------------|-----------|------|
|         |             |                        | Young nodes        | Old nodes | All  |
| 25 000  | root node   | MSC (SNAPP)            | 12.8               | 5.2       | 9.8  |
| 25 000  | root node   | concatenation (BEAST)  | 16.1               | 5.2       | 11.8 |
| 25 000  | young node  | MSC (SNAPP)            | 14.8               | 7.4       | 11.7 |
| 25 000  | young node  | concatenation (BEAST)  | 18.2               | 7.1       | 13.5 |
| 100 000 | root node   | MSC (SNAPP)            | 12.7               | 5.8       | 10.0 |
| 100 000 | root node   | concatenation (BEAST)  | 35.6               | 6.1       | 24.0 |
| 400 000 | root node   | MSC (SNAPP)            | 13.3               | 6.2       | 10.5 |
| 400 000 | root node   | concatenation (BEAST)  | 116.6              | 11.3      | 75.2 |

*Notes:* Mean node-age error is presented separately for nodes with young (true node age < 10 myr) and old (true node age > 10 myr) nodes. Note that very young nodes (true node age < 0.5 myr) are excluded from this comparison.

390 concatenation, the mean age estimate for a node with a true age around 3 Ma ( $\pm 0.2$  myr)  
391 increased from 3.3 Ma with  $N = 25\,000$  to 3.7 Ma with  $N = 100\,000$  and 5.9 Ma with  
392  $N = 400\,000$ , while mean age estimates for these nodes with the MSC remained between  
393 3.0 and 3.2 Ma regardless of population size.

## 394 BAYESIAN DIVERGENCE-TIME ESTIMATION WITH 395 EMPIRICAL SNP DATA

### 396 *Reanalysis of Neotropical Army Ant SNP Data*

397 Divergence times of Neotropical army ants were estimated by Winston et al. (2017)  
398 based on a data set of 419 804 RAD-seq loci (39 927 958 bp with 87.2% missing data),  
399 sequenced from 146 specimens of 18 species in five genera. Phylogenetic analysis of the  
400 concatenated data set led to divergence-time estimates older than 3 Ma between Central  
401 American and predominantly South American populations in each of four species of genus  
402 *Eciton* (*E. mexicanum*, *E. lucanoides*, *E. vagans*, and *E. burchellii*), which were taken as

403 evidence for temporary land bridges prior to the full closure of the Panamanian Isthmus  
404 (Winston et al. 2017). To allow an efficient reanalysis of army ant divergence times with  
405 the MSC model, we reduced the size of this data set to the four specimens with the lowest  
406 proportions of missing data for each species, or for each of the two geographic groups in the  
407 four species *E. mexicanum*, *E. lucanoides*, *E. vagans*, and *E. burchellii*. We further filtered  
408 the data set so that maximally one SNP was included per RAD locus. The reduced data  
409 set included 413 bi-allelic SNPs suitable for analysis with SNAPP, with data available for  
410 at least one specimen per species. SNAPP input files in XML format were generated with  
411 the script “snapp\_prep.rb” (see above), using the same settings as for analyses of  
412 simulated data, except that the operator on the tree topology was not excluded. As in  
413 Winston et al. (2017), time calibration was based on the published age estimate of 37.23  
414 Ma (confidence interval: 46.04-28.04 Ma) for the most recent common ancestor of  
415 Neotropical army ants (Brady et al. 2014). We specified this age constraint as a  
416 normally-distributed calibration density with a mean of 37.23 Ma and a standard deviation  
417 of 4.60 myr. To further reduce computational demands of the SNAPP analysis, we also  
418 enforced monophyly of each genus, and of each of the four species represented by two  
419 populations, according to the strong support (BPP: 1.0) that these groups received in  
420 Winston et al. (2017). We performed five replicate SNAPP analyses, each with a run  
421 length of 500 000 MCMC iterations. Chain convergence and stationarity were assessed  
422 through comparison of parameter traces among analysis replicates, using the software  
423 Tracer v.1.6 (Rambaut et al. 2014). As stationarity was supported by ESS values above  
424 200 for all parameters in each analysis, MCMC chains of analysis replicates were combined  
425 after discarding the first 10% of each chain as burn-in. None of the ESS values of the  
426 combined chains were below 1 000, strongly supporting convergence of all analyses.

427 For comparison, we also repeated the analysis of army ant divergence times based  
428 on concatenation of all sequences, using a single specimen for each of the 22 species and

429 geographic groups and excluding alignment positions with more than 50% missing data,  
430 which resulted in an alignment of 3 058 724 bp (with 37.1% missing data). Analyses based  
431 on concatenation were conducted in BEAST, using the GTR substitution model (Tavaré  
432 1986) with gamma-distributed among-site rate variation and the same tree prior, clock  
433 model, and constraints as in analyses with the MSC. We again performed five analysis  
434 replicates, each with 600 000 MCMC iterations, and stationarity and convergence were  
435 again supported by ESS values above 200 in each individual analysis replicate and above  
436 1 000 after combining the five MCMC chains.

### 437 *Results: Timeline of Neotropical Army Ant Diversification*

438 Our reanalysis of Neotropical army ant SNP data with the MSC resulted in a  
439 strongly supported phylogeny (mean BPP: 0.94) that recovered the topology proposed by  
440 Winston et al. (2017) with the single exception that *Eciton mexicanum* appeared as the  
441 sister of *E. lucanoides* rather than diverging from the common ancestor of *E. lucanoides*, *E.*  
442 *burchellii*, *E. drepanophorum*, and *E. hamatum* (Supplementary Figure S5 and  
443 Supplementary Table S3). However, the timeline of army ant divergences inferred with the  
444 MSC was markedly different from the timeline estimated by Winston et al. (2017).  
445 Whereas Winston et al. (2017) estimated the crown divergence of the genus *Eciton* to have  
446 occurred around 14.1 Ma, our analysis based on the MSC placed this divergence around  
447 the Miocene-Pliocene boundary (5.48 Ma; 95% HPD: 7.52-3.52 Ma). In contrast to the  
448 previous analysis, the divergences between Central American and predominantly South  
449 American populations within *E. mexicanum* (1.82 Ma; 95% HPD: 3.02-0.76 Ma), *E.*  
450 *lucanoides* (2.47 Ma; 95% HPD: 3.88-1.22 Ma), *E. vagans* (0.33 Ma; 95% HPD: 0.71-0.05  
451 Ma), and *E. burchellii* (0.54 Ma; 95% HPD: 1.12-0.13 Ma) were all placed in the  
452 Pleistocene in our study, in agreement with migration subsequent to the final isthmus  
453 closure. The population size inferred with the MSC, applying to all extant and ancestral

454 species equally, was  $N = 53\,854$  (95% HPD: 34\,433-75\,294) diploid individuals, based on an  
455 assumed generation time of 3 years (Berghoff et al. 2008).

456 When using concatenation to estimate army ant divergence times, the mean age  
457 estimates of splits between Central American and predominantly South American lineages  
458 within *E. mexicanum* (2.47 Ma; 95% HPD: 3.09-1.88 Ma), *E. lucanoides* (3.74 Ma; 95%  
459 HPD: 4.68-2.83 Ma), *E. vagans* (1.31 Ma; 95% HPD: 1.65-1.00 Ma), and *E. burchellii* (2.07  
460 Ma; 95% HPD: 2.56-1.55 Ma) were 35.7-397.1% older (Supplementary Figure S6 and  
461 Supplementary Table S4) than those based on the MSC model. While these age estimates  
462 for population splits in *E. mexicanum*, *E. vagans*, and *E. burchellii* would still agree with  
463 migration after the final closure of the isthmus, the confidence interval for the divergence  
464 time of populations within *E. lucanoides* does not include the accepted age for the final  
465 isthmus closure (2.8 Ma; O’Dea et al. 2016) and would thus support the existence of earlier  
466 land bridges.

### 467 *Generation of SNP Data for Neotropical Sea Catfishes*

468 Twenty-six individuals that belong to 21 recognized species and two possibly cryptic  
469 species of the five Neotropical sea catfish genera *Ariopsis*, *Bagre*, *Cathorops*, *Notarius*, and  
470 *Sciades* were analyzed using RAD-seq (samples listed in Supplementary Table S5,  
471 including GPS coordinates and locality names). For four of these genera, our taxon set  
472 includes both species endemic to the TEP and species endemic to the Caribbean, hence,  
473 the divergences of these taxa were expected to have occurred prior to or simultaneously  
474 with the closure of the Panamanian Isthmus. Taxonomic identifications have previously  
475 been conducted for the same samples based on morphology as well as mitochondrial  
476 sequences (see Stange et al. 2016 for details) and were therefore considered to be reliable.

477 Fresh fin tissues were preserved in 96% ethanol for subsequent DNA extraction.  
478 DNA was extracted using the DNeasy Blood & Tissue Kit (Qiagen, Valencia, USA)

479 following the manufacturer's instructions. RNase treatment after digestion (but before  
480 precipitation) was performed in order to improve the purity of the samples. DNA  
481 concentrations were measured using a NanoDrop™ 1000 Spectrophotometer (Thermo  
482 Scientific, Waltham, MA, USA). The samples were standardized to 23.5 ng/μl and used to  
483 generate a RAD library, following the preparation steps described in Roesti et al. (2012)  
484 and using restriction enzyme Sbf1. We assumed a genome size of approximately 2.4 Gb as  
485 inferred from available C-values for sea catfishes (Gregory 2016). Therefore, we expected a  
486 recognition site frequency of 20 per Mb, which would yield around 50,000 restriction sites  
487 in total. Specimens were individually barcoded with 5-mer barcodes.

488 Two libraries were prepared and single-end sequenced with 201 cycles on the  
489 Illumina HiSeq 2500 platform, at the Department of Biosystems Science and Engineering,  
490 ETH Zurich. The resulting raw reads were demultiplexed (NCBI study accession:  
491 SRP086652) based on the individual barcodes with the script “process\_radtags.pl” of the  
492 software Stacks v.1.32 (Catchen et al. 2011) and further analyzed with pyRAD v.3.0.5  
493 (Eaton 2014). Settings of the pyRAD analysis included a minimum depth of 20 per  
494 within-sample cluster (Mindepth: 20), a maximum of four sites with a quality value below  
495 20 (NQual: 4), maximally 20 variable sites within a cluster (Wclust: 0.89), and a minimum  
496 of 18 samples in a final locus (MinCov: 18). Quality filtering (step 2 in the pyRAD  
497 pipeline; Eaton 2014) resulted in the exclusion of 23-56% of the reads; after filtering,  
498 between 2.4 and 5.6 million reads remained per individual. Reads that passed the applied  
499 filtering steps resulted in about 40 000-166 000 within-sample clusters (step 3) with mean  
500 depths between 44 and 89. The estimated error rate and heterozygosity of these clusters  
501 (step 4) amounted to 0.0004-0.0009 and 0.0042-0.0107, respectively. Consensus-sequence  
502 creation from the within-sample clusters (step 5) based on the estimated heterozygosity  
503 and error rate, with a maximum of 20 variable sites, a minimal depth of 20, and additional  
504 paralog filtering (maximally 10% shared heterozygous sites), resulted in 21 575-38 182



505 consensus loci per sample. Between-sample clusters (step 6) were created with the same  
506 settings as within-sample clusters. These clusters were filtered again for potential paralogs  
507 (step 7) with a maximum of five shared heterozygous sites. The final data set contained  
508 10 991-14 064 clusters per individual. From these clusters, one SNP per locus was selected  
509 at random for use in phylogenetic inference, assuming that SNPs of different loci are  
510 effectively unlinked.

### 511 *Inferring the Divergence History of Neotropical Sea Catfishes*

512 To incorporate existing estimates of the timeline of Neotropical sea catfish evolution  
513 into our analyses, we identified the age of the most recent common ancestor of the five sea  
514 catfish genera included in our taxon set (*Ariopsis*, *Bagre*, *Cathorops*, *Notarius*, and  
515 *Sciades*) from the time-calibrated phylogeny of Betancur-R. et al. (2012). Details of this  
516 phylogenetic analysis are given in Betancur-R. et al. (2012). In brief, Betancur-R. et al.  
517 (2012) used concatenation of five mitochondrial and three nuclear genes (a total of 7 190  
518 sites) for phylogenetic inference of 144 species (representing 28 of the 29 valid genera of sea  
519 catfishes as well as diverse teleost outgroups), and divergence times were estimated with  
520 BEAST v.1.6.1 (Drummond et al. 2012) on the basis of 14 fossils and five biogeographic  
521 node-age constraints. However, as three of these biogeographic constraints were derived  
522 from an assumed closure of the Isthmus of Panama between 3.1 and 2.8 Ma and since our  
523 goal was to compare the timeline of Neotropical sea catfish evolution with the age  
524 estimates for the closure of the isthmus, we repeated the analysis of Betancur-R. et al.  
525 (2012) excluding these three constraints to avoid circular inference. All other analysis  
526 settings were identical to those used in Betancur-R. et al. (2012) but we used BEAST  
527 v.1.8.3, the latest version of BEAST compatible with the input file of Betancur-R. et al.  
528 (2012), and 150 million MCMC iterations for the inference.

529 The resulting age estimate for the most recent common ancestor of the genera  
530 *Ariopsis*, *Bagre*, *Cathorops*, *Notarius*, and *Sciades* (27.42 Ma; 95% HPD: 30.89-24.07 Ma)  
531 was then used as a constraint on the root of a species tree of Neotropical sea catfishes  
532 inferred with SNAPP, based on our RAD-seq data set of 21 sea catfish species. For this  
533 analysis, we used 1 768 bi-allelic SNPs for which data were available for at least one  
534 individual of each species or population. *Bagre pinnimaculatus* from Panama and *Sciades*  
535 *herzbergii* from Venezuela were represented by two individuals each, which were both  
536 considered as representatives of separate lineages in the SNAPP analyses. Differentiation  
537 between the populations from which these individuals were sampled was previously  
538 described based on morphology (*Bagre pinnimaculatus*) and distinct mitochondrial  
539 haplotypes (both species) (Stange et al. 2016). We again used our script “snapp\_prep.rb”  
540 (see above) to convert the SNP data set into SNAPP’s XML format.

541 The strict molecular clock rate was calibrated with a normally distributed  
542 calibration density (mean: 27.4182 Ma, standard deviation: 1.7 myr) on the root age,  
543 according to the result of our reanalysis of the Betancur-R. et al. (2012) data set. In  
544 addition, the fossil record of sea catfishes was used to define minimum ages for several  
545 lineages. The oldest fossil records of the genera *Bagre*, *Cathorops*, and *Notarius* have been  
546 described from the eastern Amazon Pirabas Formation on the basis of otolith and skull  
547 material (Aguilera et al. 2013). As the Pirabas Formation is of Aquitanian age (Aguilera  
548 et al. 2013), we constrained the divergences of each of the three genera with a minimum age  
549 of 20.4 Ma (Cohen et al. 2013). Furthermore, skull remains of the extant species *Sciades*  
550 *dowii*, *Sciades herzbergii*, *Bagre marinus*, and *Notarius quadriscutis* have been identified in  
551 the Late Miocene Urumaco Formation of northwestern Venezuela (Aguilera and  
552 de Aguilera 2004a), which therefore provides a minimum age of 5.3 Ma for these species.  
553 All fossils used for phylogenetic analyses are summarized in Supplementary Table S6.

554 We carried out five replicate SNAPP analyses, each with a run length of one million

555 MCMC iterations, of which the first 10% were discarded as burn-in. Convergence was  
556 suggested by ESS values for all parameters above 200 in individual replicate analyses, and  
557 by ESS values above 1 000 after combining the output of the five replicates. The combined  
558 analysis output was used to sample a set of 1 000 trees as representative of the posterior  
559 tree distribution.

560 For the purpose of reconstructing ancestral distributions of sea catfishes taking into  
561 account the localities of fossil finds, eight fossil taxa were added to each of the 1 000 trees  
562 of the posterior tree set, according to their taxonomic assignment (Supplementary Table  
563 S6). For all additions, the age of the attachment point was chosen at random between the  
564 fossil's age and the age of the branch to which the fossil was attached. We then used the  
565 posterior tree set including fossil taxa to infer the ancestral distribution of sea catfish  
566 lineages in the TEP or the Caribbean, based on stochastic mapping of discrete characters  
567 (Huelsenbeck et al. 2003) as implemented in function “make.simmap” of the phytools R  
568 package (Revell 2012). For this analysis, we assumed a uniform prior probability for the  
569 state of the root node and used an empirically determined rate matrix (Fig. 4,  
570 Supplementary Figure S7, and Supplementary Table S7). For comparison, we also  
571 performed a separate reconstruction of ancestral geography using the structured coalescent  
572 implementation of the BASTA package (De Maio et al. 2015) for BEAST. The  
573 reconstructed ancestral geographies were identical with both approaches; we therefore  
574 discuss only the results of the stochastic mapping approach below but provide results with  
575 both approaches in Supplementary Table S7.

### 576 *Results: Timeline of Neotropical Sea Catfish Diversification*

577 The posterior distribution of species trees is illustrated in Figure 4 in the form of a  
578 cloudogram (Bouckaert and Heled 2014) with branches colored according to the stochastic  
579 mapping of geographic distribution. Our results suggest that the genus *Cathorops* is the

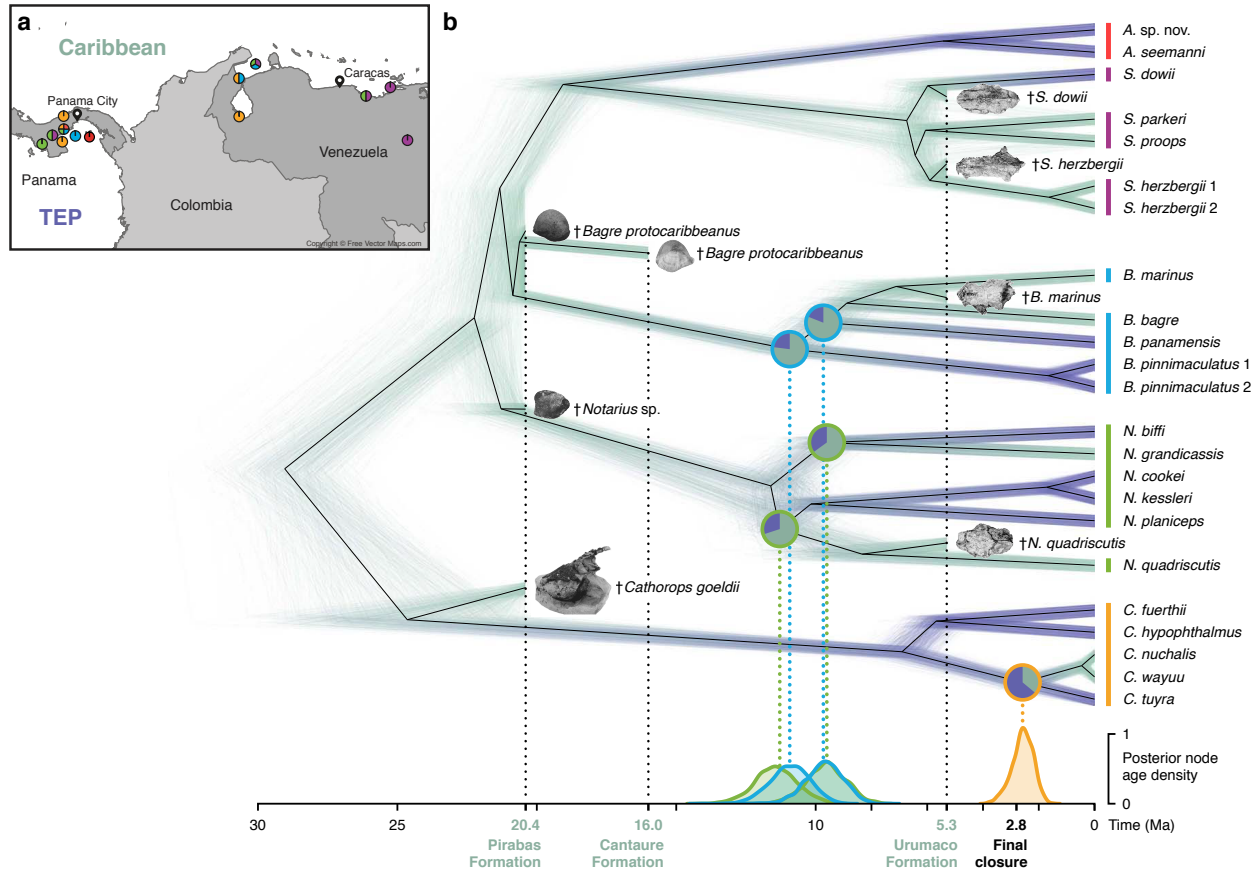

Figure 4: Time-calibrated species tree of Neotropical sea catfishes.

a) Map of Panama and north-western South America with sampling locations of specimens used in this study. Colors of circles indicate genera of specimens sampled at a location: *Ariopsis*, red; *Sciades*, purple; *Bagre*, blue; *Notarius*, green; *Cathorops*, orange. b) Posterior distribution of time-calibrated species trees inferred with SNAPP, with fossil taxa added a posteriori (images of otoliths and partial skulls are from Aguilera and de Aguilera 2004b and from Aguilera et al. 2013, 2014; see Supplementary Table S6). Branch color indicates reconstructed geography: Caribbean; green, or Tropical Eastern Pacific (TEP); dark blue. Posterior densities of divergence times between Caribbean and Pacific lineages within *Notarius* (green), *Bagre* (blue), and *Cathorops* (orange) are shown below the species tree. Note that two divergence events around 10 Ma have nearly identical posterior density distributions: the divergence between *N. grandicassis* and *N. biffi* and the divergence between *B. panamensis* and the ancestor of *B. bagre* and *B. marinus*. Pie charts on nodes corresponding to divergences between Caribbean and Pacific lineages indicate posterior probabilities of ancestral distributions. All posterior estimates of node support, divergence times, and ancestral geography are summarized in Supplementary Table S7.

580 outgroup to the other four genera (Bayesian posterior probability, BPP: 1.0) and that the  
581 earliest divergence between these groups probably occurred in what is now the Caribbean  
582 (BPP: 0.81). The four genera *Notarius*, *Bagre*, *Sciades*, and *Ariopsis* diverged (probably in  
583 this order; BPP: 0.92) in a rapid series of splitting events that occurred between 22 and 19  
584 Ma, most likely also in the Caribbean (BPP: 0.89-1.0). Within-genus diversification of the  
585 sampled extant lineages began between 12 (*Notarius*) and 5 (*Ariopsis*) Ma, and these  
586 initial within-genus divergences occurred both within the Caribbean (*Sciades*, BPP: 1.0;  
587 *Bagre*, BPP: 0.77) and the TEP (*Ariopsis*, BPP: 0.89; *Cathorops*, BPP: 0.80). The most  
588 recent divergence between Caribbean and Pacific sea catfishes separated the Caribbean  
589 *Cathorops nuchalis* and *C. wayuu* from the Pacific *C. tuyra*, which occurred around 2.58  
590 Ma (95% HPD: 3.37-1.87 Ma). Assuming a generation time of 2 years for sea catfishes  
591 (Betancur-R. et al. 2008; Meunier 2012), the estimated population size was  $N = 127\,250$   
592 (95% HPD: 105\,120-151\,900) diploid individuals.

## 593 DISCUSSION

### 594 *Divergence-Time Estimation with Genome-Wide SNP Data*

595 Our analyses based on simulated SNP data demonstrate that SNAPP, combined  
596 with a molecular clock model, allows the precise and unbiased estimation of divergence  
597 times in the presence of incomplete lineage sorting. As expected, the precision of estimates  
598 increased with the number of SNPs used for the analysis. With 3 000 SNPs, the largest  
599 number of simulated SNPs used in our analyses, uncertainty in divergence times resulted  
600 almost exclusively from the width of the calibration density (Fig. 1). In addition to data-set  
601 size, the placement of the node-age calibration also had an effect on the precision of  
602 divergence-time estimates, which was improved when the root node was calibrated instead

603 of a younger node. This suggests that future studies employing divergence-time estimation  
604 with SNAPP should make use of constraints on the root node if these are available from  
605 the fossil record, from biogeographic scenarios, or from previously published time-calibrated  
606 phylogenies (as in our analyses of empirical SNP data of Neotropical army ants and sea  
607 catfishes). While we did not test the performance of multiple calibration points with  
608 simulated data, the use of additional calibration points can be expected to further improve  
609 the precision of divergence-time estimates; therefore these should be used if available.

610 It should be noted that even though all our analyses of both simulated and  
611 empirical data sets were calibrated through node-age constraints, this so-called “node  
612 dating” approach has been criticized for several reasons (Heath et al. 2014; O’Reilly et al.  
613 2015; Matschiner et al. 2017). One problem associated with node dating is that prior  
614 distributions defined for node-age constraints are often chosen arbitrarily when minimum  
615 ages are provided by specific fossils but maximum ages are unknown. This problem has  
616 been addressed by using fossils as terminal taxa in “total-evidence dating” (Ronquist et al.  
617 2012) and the “fossilized birth-death process” (Heath et al. 2014; Gavryushkina et al.  
618 2017), but unfortunately, both of these approaches are not yet compatible with SNAPP.  
619 However, as a third alternative that overcomes the limitations of node dating, Matschiner  
620 et al. (2017) developed prior distributions for clade ages based on a model of diversification  
621 and fossil sampling and showed that these distributions allow unbiased inference when  
622 estimates for the rates of diversification and fossil sampling are available. The approach of  
623 Matschiner et al. (2017) is implemented in the CladeAge package for BEAST, which can be  
624 used in combination with SNAPP.

625 A limitation of our approach is the assumption of equal and constant population  
626 sizes on all branches of the phylogeny, which corresponded to the settings used in our  
627 simulations but may rarely be met in nature. Population growth or decline within a lineage  
628 is generally not estimated by SNAPP and may be only weakly identifiable in some cases

629 Kuhner et al. (1998). Furthermore, the linking of population sizes was necessary to achieve  
630 feasible run times for analyses of data sets with around 20 species (with this number of  
631 species, assuming an individual population size for each branch would require an additional  
632 37 model parameters). The single population-size parameter estimated with our method  
633 will therefore most commonly represent an intermediate value within the range of the true  
634 population sizes of the taxa included in the data set. As a result, divergence times might  
635 be slightly overestimated for groups in which the population size is underestimated and  
636 vice versa. Nevertheless, we expect that the degree of this misestimation is minor  
637 compared to the bias introduced by the alternative strategy of concatenation (Fig. 3, Table  
638 4), which is equivalent to the MSC model only when all population sizes are so small that  
639 incomplete lineage sorting is absent and all gene trees are identical in topology and branch  
640 lengths (Edwards et al. 2016).

641 As a further limitation of our approach, only the strict molecular clock model is  
642 currently available in SNAPP; relaxed clock models such as the commonly used  
643 uncorrelated lognormal clock model of Drummond et al. (2006) have not yet been  
644 implemented. This means that particularly in clades that may be expected to have  
645 different mutation rates in different lineages, the precision of divergence-time estimates  
646 may be exaggerated, which should be considered in the interpretation of such results.

647 Our experiment 4 revealed that when SNP data sets are used without the addition  
648 of invariant sites, SNAPP's estimates for the clock rate and  $\Theta$  did not match those used in  
649 simulations (Fig. 2a,b, Table 3). While this mismatch might appear as a weakness of our  
650 approach, we do not consider it unexpected that these estimates change when  
651 slowly-evolving sites are excluded from the data set. Nevertheless, there are reasons why  
652 SNP-only data sets might be preferred over data sets that also include all invariant sites  
653 (Leaché and Oaks 2017). These reasons may be of practical nature, such as the  
654 comparative ease with which SNP-only data sets can be handled computationally due to

655 their smaller file sizes, or the lower cost of genotyping when SNP arrays are used (even  
656 though these may be affected by additional biases; Leaché and Oaks 2017). A more  
657 important reason to use SNP-only data sets, however, is that determining whether or not  
658 sites are truly invariant is often not trivial due to low read coverage or mapping quality. As  
659 a result, the number of sites assumed to be invariant depends on the filters applied in  
660 variant calling and the ideal filtering settings that would result in the correct proportion of  
661 invariant sites are usually unknown. On the other hand, if the investigator chooses to focus  
662 exclusively on SNPs, strict filtering threshold can be applied that result in a conservative  
663 data set consisting only of sites that are known with high confidence to be variable. Based  
664 on the results of our analyses with simulated and empirical data, we argue that such data  
665 sets are highly suitable for phylogenetic inference with SNAPP, even though clock rate and  
666  $\Theta$ -values estimated from these data do not represent their genome-wide analogues. In our  
667 view, this mismatch is irrelevant for most phylogenetic analyses (even though users should  
668 be aware of it) because the clock rate and  $\Theta$  usually represent nuisance parameters whereas  
669 the phylogeny, the divergence times, and the population size are of interest. As  
670 demonstrated in our experiments, all of these parameters of interest are estimated reliably  
671 from SNP data with our approach of divergence-time estimation with SNAPP, provided  
672 that SNAPP's ascertainment-bias correction is applied.

### 673 *Insights Into the Taxonomy of Neotropical Sea Catfishes*

674 Different views on the taxonomy of sea catfishes (Ariidae) have been supported by  
675 phylogenetic inference based on morphological features (Marceniuk et al. 2012b) and  
676 molecular data (Betancur-R. et al. 2007; Betancur-R. 2009). In the following, we address  
677 the most important differences between these views and how they are supported by our  
678 results, as well as new findings with regard to cryptic species.



679 *Bagre and Cathorops*.— The morphology-based phylogenetic analysis of Marceniuk et al.  
680 (2012b) supported an earlier proposal by Schultz (1944) to raise the genus *Bagre* to family  
681 status due to its extraordinary morphological distinctiveness and its inferred position  
682 outside of a clade combining almost all other genera of sea catfishes. On the other hand,  
683 molecular studies have recovered *Bagre* in a nested position within sea catfishes, a position  
684 that is also supported by our results (Betancur-R. et al. 2007, 2012; Betancur-R. 2009).  
685 The proposed status of *Bagre* as a separate family is therefore not supported by molecular  
686 data. Instead of *Bagre*, our phylogeny identified the genus *Cathorops* as the sister of a  
687 clade combining *Notarius*, *Bagre*, *Sciades*, and *Ariopsis*, in contrast not only to  
688 morphology-based analyses but also to previous molecular studies that recovered a clade  
689 combining *Cathorops*, *Bagre*, and *Notarius*, albeit with low support (Betancur-R. et al.  
690 2007, 2012; Betancur-R. 2009).

691 Within the genus *Bagre*, the existence of cryptic species has previously been  
692 suggested in *B. pinnimaculatus* based on cranio-morphological differences and distinct  
693 mitochondrial haplotypes of populations from the Bay of Panama and from Rio Estero  
694 Salado, Panama (Stange et al. 2016). Our current results corroborate this view, given that  
695 the estimated divergence time of the two populations (*B. pinnimaculatus* 1 and *B.*  
696 *pinnimaculatus* 2 in Fig. 5) is old (1.66 Ma; 95% HPD: 2.30-1.08 Ma) compared to the  
697 expected coalescence time within a species ( $T_{exp} = 2 \times Ng = 2 \times 127\,250 \times 2 \text{ yr} =$   
698  $509\,000 \text{ yr}$ ; with  $N$  according to SNAPP's population size estimate and  $g$  according to an  
699 assumed generation time of two years for sea catfishes; Betancur-R. et al. 2008).

700 While *Cathorops nuchalis* has been declared a valid taxon based on morphological  
701 differentiation (Marceniuk et al. 2012a), mitochondrial sequences of this species were found  
702 to be indistinguishable from its sister species *C. wayuu* (Stange et al. 2016). In contrast,  
703 the nuclear SNP variation investigated here suggests that the two species are well  
704 differentiated and diverged 460 ka (95% HPD: 740-220 ka).

705 *Notarius*.— According to our results, *Notarius quadriscutis* is either the sister to a Pacific  
706 clade composed of *N. cookei*, *N. kessleri*, and *N. planiceps* (BPP: 0.54), the sister to *N. biffi*  
707 and *N. grandicassis* (BPP: 0.07), or the sister to all other sampled extant members of the  
708 genus (BPP: 0.39). Based on morphology, the species has previously been placed in genus  
709 *Aspistor* together with *N. luniscutis* and the extinct *N. verumquadriscutis* (Marceniuk  
710 et al. 2012b; Aguilera and Marceniuk 2012). However, molecular phylogenies have  
711 commonly recovered species of the genus *Aspistor* as nested within *Notarius* (Betancur-R.  
712 and Acero P. 2004; Betancur-R. et al. 2012) and thus do not support the distinction of the  
713 two genera. Regardless of the exact relationships of *Notarius quadriscutis* in our species  
714 tree, our analyses suggest that the lineage originated around the time of the crown  
715 divergence of *Notarius* (11.61 Ma; 95% HPD: 13.23-10.21 Ma) and is thus younger than the  
716 earliest fossils assigned to the genus, *Notarius* sp. (Early Miocene; Aguilera et al. 2014).  
717 This implies that considering *Aspistor* as separate from *Notarius* would also require a  
718 reevaluation of fossils assigned to *Notarius*.

719 *Ariopsis* and *Sciades*.— While molecular studies have supported the reciprocal monophyly  
720 of the genera *Ariopsis* and *Sciades* (Betancur-R. et al. 2007, 2012), species of the genus  
721 *Ariopsis* appeared paraphyletic in the morphology-based cladogram of Marceniuk et al.  
722 (2012b) and were there considered as members of *Sciades*. Our species tree inferred with  
723 SNAPP supports the results of previous molecular analyses since both genera appear as  
724 clearly monophyletic sister groups (BPP: 1.0) that diverged already in the Early Miocene  
725 (19.06 Ma; 95% HPD: 20.94-17.45 Ma).

726 Within *Sciades*, differentiation of mitochondrial haplotypes has been observed  
727 between brackish-water and marine populations of *S. herzbergii* from Clarines, Venezuela,  
728 and from the Gulf of Venezuela (Stange et al. 2016). Our relatively old divergence-time  
729 estimate (1.64 Ma; 95% HPD: 2.20-1.04 Ma) provides further support for substantial

730 differentiation of the two populations (*S. herzbergii* 1 and *S. herzbergii* 2 in Fig. 5) that  
731 could be driven by ecological adaptations to their contrasting habitats.

### 732 *Implications for the Closure of the Panamanian Isthmus*

733 In agreement with our results based on simulated data, our reanalysis of  
734 genome-wide army ant data with both the MSC model and with concatenation indicated  
735 that recent divergence times can be overestimated if incomplete lineage sorting is not  
736 accounted for. As a result, the colonization of the North American landmass by army ants  
737 prior to the final closure of the Isthmus of Panama (2.8 Ma; O’Dea et al. 2016) was  
738 supported by our analyses using concatenation, but not by those using the MSC model.  
739 However, even the divergence times estimated with concatenation were generally younger  
740 than the divergence times reported by Winston et al. (2017), also on the basis of  
741 concatenation. This suggests that besides the variation introduced by the use of  
742 concatenation and the MSC, age estimates of army ant divergences were also influenced by  
743 other differences between our Bayesian divergence-time estimation and the analyses of  
744 Winston et al. (2017), which employed a penalized likelihood approach (Sanderson 2002) to  
745 estimate divergence times. These differences included not only the methodology used for  
746 time calibration, but also the number of specimens and alignment sites used in the analysis,  
747 as we had to filter the data set to comply with the assumption of the tree prior and to  
748 reduce the computational demands of the BEAST analysis. Nevertheless, our results  
749 suggest that previous claims of army ant migration to the North American landmass prior  
750 to the final isthmus closure (Winston et al. 2017) should be viewed with caution.

751 By combining Bayesian phylogenetic inference with reconstruction of ancestral  
752 geographic distributions, our analyses of sea catfish SNP data allowed us to estimate the  
753 timing and the location of divergence events separating lineages of Caribbean and Pacific  
754 sea catfishes (Fig. 5). The youngest of these events is the divergence of the Caribbean

755 common ancestor of *Cathorops nuchalis* and *C. wayuu* from the Pacific *C. tuyra*, which we  
756 estimated to have occurred around 2.58 Ma (95% HPD: 3.37-1.87 Ma). As this age  
757 estimate coincides with the final closure of the Panamanian Isthmus around 2.8 Ma (O’Dea  
758 et al. 2016; Groeneveld et al. 2014), it appears likely that the closure was causal for  
759 vicariant divergence within *Cathorops*. According to our reconstruction of ancestral  
760 geographic distributions, the common ancestor of the three species *C. nuchalis*, *C. wayuu*,  
761 and *C. tuyra* more likely lived in the TEP (BPP: 0.64) than in the Caribbean. We note  
762 that this discrete type of inference may appear incompatible with the assumption that  
763 these lineages speciated through vicariance, given that in this case, the geographic  
764 distribution of the common ancestor should have extended across both regions as long as  
765 they were still connected. While our discrete ancestral reconstructions did not allow us to  
766 model this scenario of partially continuous distributions explicitly, our reconstructions can  
767 be reconciled with it if the inferred discrete geography is viewed not as the exclusive  
768 distribution of a species, but as the center of its distribution instead.

769 Surprisingly, the divergence of Caribbean and Pacific lineages within *Cathorops* was  
770 the only splitting event in our sample of sea catfishes that could be associated with the  
771 final closure of the Panamanian Isthmus around 2.8 Ma, even though the closure could be  
772 expected to affect a large number of species simultaneously. Instead, near-simultaneous  
773 divergence events between Caribbean and Pacific lineages were inferred at a much earlier  
774 time, about 10 Ma, in the genera *Bagre* and *Notarius*. Within *Notarius*, *N. grandicassis* of  
775 the Caribbean and the West Atlantic diverged from *N. biffi* of the TEP around 9.63 Ma  
776 (95% HPD: 10.99-8.30 Ma). This event may have coincided with the separation of  
777 Caribbean and Pacific lineages within *Bagre* (9.70 Ma; 95% HPD: 11.05-8.50 Ma), where  
778 the Pacific species *B. panamensis* diverged from a predominantly Caribbean (BPP: 0.81)  
779 ancestor that later gave rise to *B. bagre* and *B. marinus*. Two further divergence events  
780 between Caribbean and Pacific lineages of *Bagre* and *Notarius* were inferred slightly earlier,

781 around 11 Ma. At 10.93 Ma (95% HPD: 12.29-9.60 Ma), the Pacific species *Bagre*  
782 *pinnimaculatus* diverged from the common ancestor of *B. marinus*, *B. bagre*, and *B.*  
783 *panamensis*, which likely had a distribution centered in the Caribbean (BPP: 0.77).  
784 Additionally, the common ancestor of the Pacific clade comprising *Notarius cookei*, *N.*  
785 *kessleri*, and *N. planiceps* diverged from the predominantly Caribbean (BPP: 0.70) lineage  
786 leading to *N. quadriscutis* at 11.29 Ma (95% HPD: 12.75-9.86 Ma).

787 Our time-calibrated species tree with reconstructed ancestral distributions (Fig. 5)  
788 shows further divergence events that separated Caribbean and Pacific lineages. The two  
789 sampled species of *Ariopsis* both occur in the TEP and diverged at about 19.06 Ma (95%  
790 HPD: 20.94-17.45 Ma) from the predominantly Caribbean genus *Sciades*. However, since  
791 *Ariopsis* also contains Caribbean species that we did not include in our data set, it remains  
792 unclear when and how often transitions between the Caribbean and the TEP took place in  
793 this genus. Caribbean origins of the genus *Cathorops* and of the species *Sciades dowii* are  
794 suggested by fossils from the Pirabas and Urumaco formations and indicate that these two  
795 lineages migrated to the Pacific after or simultaneous to the divergence from the fossil  
796 representatives. But since these divergence times were not estimated in our SNAPP  
797 analysis, the timing of migration of *Cathorops* and *Sciades dowii* also remains uncertain.

798 Regardless of these uncertainties, the near-simultaneous occurrence of several  
799 divergence events between Pacific and Caribbean lineages around 11-10 Ma suggests that  
800 geological processes associated with the emergence of the Panamanian Isthmus promoted  
801 vicariance long before the final closure of the isthmus around 2.8 Ma. Thus, even though  
802 our reanalysis of Neotropical army ant data suggested that army ants did not colonize the  
803 North American landmass before the final isthmus closure, our results based on sea catfish  
804 data add to the body of molecular evidence that indicates the emergence of temporary land  
805 bridges in the Late Miocene, leading to the separation of marine populations and migration  
806 of terrestrial animals (Donaldson and Wilson Jr 1999; Musilová et al. 2008; Bacon et al.

807 2015a,b; Carrillo et al. 2015; Acero P. et al. 2016; Huang 2016) long before the Great  
808 American Biotic Interchange (Woodburne 2010). While Miocene land bridges have been  
809 supported by a number of studies (Collins et al. 1996; Montes et al. 2015; Bacon et al.  
810 2015a), it remains debated whether all of the connections between the Caribbean and the  
811 Pacific closed prior to 2.8 Ma, and whether they were blocked at the same time (O’Dea  
812 et al. 2016). Nevertheless, even if land bridges did not block all passages simultaneously,  
813 their emergence might have disrupted the distributions of catfish populations if these were  
814 localized in areas away from the remaining openings.

815         Although the rapid succession of divergence events between Caribbean and Pacific  
816 sea catfish lineages around 11-10 Ma indicates vicariance as the result of emerging land  
817 bridges, we cannot exclude that these events were driven by other modes of speciation,  
818 such as ecological speciation, and that their clustering within this relatively short period is  
819 coincidental. To discriminate between these possible explanations, a better understanding  
820 of the ecology of the diverging taxa will be important. In addition, the compilation of  
821 further diversification timelines for other groups of marine Neotropical species may  
822 strengthen the support for vicariance if divergences in these groups were found to cluster  
823 around the same times as in sea catfishes. As our results based on simulations suggest,  
824 these future analyses may benefit from genome-wide SNP data; however, concatenation  
825 should be avoided in favor of the MSC model to produce the most accurate estimates of  
826 divergence times. Importantly, our results clearly demonstrate that regardless of the causes  
827 of splitting events around 11-10 Ma, divergences between Caribbean and Pacific taxa are  
828 not necessarily linked to the final closure of the Panamanian Isthmus around 2.8 Ma.  
829 Thus, we reiterate earlier conclusions (Bacon et al. 2015a; De Baets et al. 2016) that the  
830 time of the final closure of the isthmus should no longer be used as a strict biogeographic  
831 calibration point for divergence-time estimation.

832

## CONCLUSION

833 We have demonstrated that the software SNAPP, combined with a molecular clock  
834 model, allows highly precise and accurate divergence-time estimation based on SNP data  
835 and the multi-species coalescent model. Our method thus provides molecular biologists  
836 with a powerful tool to investigate the timing of recent divergence events with genome-wide  
837 data. Our application of this method to two genomic data sets of Neotropical army ants  
838 and sea catfishes led to mixed support for the suggested closure of the Isthmus of Panama  
839 in the Miocene. We showed that army ants of the genus *Eciton* may have colonized the  
840 North American landmass only after the final closure of the Isthmus around 2.8 Ma and  
841 that previous conclusions supporting Miocene and Pliocene colonization events may have  
842 been influenced by branch-length bias resulting from concatenation. In contrast, we  
843 identify a series of four nearly coinciding divergence events around 10 Ma, as well as a final  
844 divergence around 2.8 Ma, between sea catfishes of the Caribbean and the TEP, which  
845 lends support to the hypothesis of Miocene isthmus closure and reopening. The rigorous  
846 application of divergence-time estimation with the multi-species coalescent model in future  
847 studies based on genomic data promises to contribute conclusive evidence for the timing  
848 and the effect of the emergence of the Panamanian Isthmus, one of the most significant  
849 events in recent geological history.

850

## FUNDING

851 M.S. was funded by a Forschungskredit from the University of Zurich (FK-15-092);  
852 M.R.S.V. and W.S. were supported by the Swiss National Science Foundation Sinergia  
853 (Sinergia Grant CRSII3\_136293). W.S. and M.M. were further supported by a grant from  
854 the European Research Council (CoG “CICHLID~X”) awarded to W.S.

855

## SUPPLEMENTARY MATERIAL

856 Supplementary Material, including figures, tables, and input and output files of  
857 SNAPP and BEAST can be found in the Dryad Data Repository  
858 <http://dx.doi.org/10.5061/dryad.f8k84>. Code for all analyses is provided on  
859 <https://github.com/mmatschiner/panama>, and the script “snapp\_prep.rb” to generate  
860 SNAPP input files in XML format is available on  
861 [https://github.com/mmatschiner/snapp\\_prep](https://github.com/mmatschiner/snapp_prep).

862

## ACKNOWLEDGEMENTS

863 We thank Remco Bouckaert for advice on divergence-time estimation with SNAPP and  
864 Emiliano Trucchi for testing our method. We are grateful to Richard Cooke for hospitality  
865 and assistance in coordinating our fieldwork in Panama, Aureliano Valencia, and Máximo  
866 Jiménez for help with sampling in Panama and Tito Barros, Cathy Villalba, and Jorge  
867 Domingo Carrillo-Briceño for field assistance and paperwork in Venezuela. We acknowledge  
868 help from Max Winston and Corrie Moreau to reuse their data set, and we thank  
869 Alexander Leow for contribution to SNP analyses. Part of this work was performed using  
870 the Abel high-performance computing facilities ([www.hpc.uio.no](http://www.hpc.uio.no)) of the University of Oslo  
871 and the sciCORE (<http://scicore.unibas.ch>) scientific computing core facility at the  
872 University of Basel.

873

\*

874 References

875 Acero P., A., J. J. Tavera, R. Anguila, and L. Hernández. 2016. A new southern Caribbean  
876 species of angel shark (Chondrichthyes, Squaliformes, Squatinidae), including phylogeny  
877 and tempo of diversification of American species. *Copeia* 104:577–585.



- 878 Aguilera, O. and D. R. de Aguilera. 2004a. Amphi-American Neogene sea catfishes  
879 (Siluriformes, Ariidae) from northern South America. *Spec. Pap. Paleontol.* 71:29–48.
- 880 Aguilera, O. and D. R. de Aguilera. 2004b. New Miocene otolith-based scianid species  
881 (Pisces, Perciformes) from Venezuela. *Spec. Pap. Paleontol.* 71:49–59.
- 882 Aguilera, O. and A. P. Marceniuk. 2012. *Aspistor verumquadriscutis*, a new fossil species of  
883 sea catfishes (Siluriformes; Ariidae) from the upper Miocene of Venezuela. *Swiss J.*  
884 *Palaeontol.* 131:265–274.
- 885 Aguilera, O., W. Schwarzhans, H. Moraes-Santos, and A. Nepomuceno. 2014. Before the  
886 flood: Miocene otoliths from eastern Amazon Pirabas Formation reveal a Caribbean-type  
887 fish fauna. *J. South Am. Earth Sci.* 56:422–446.
- 888 Aguilera, O. A., H. Moraes-Santos, S. Costa, F. Ohe, C. Jaramillo, and A. Nogueira. 2013.  
889 Ariid sea catfishes from the coeval Pirabas (Northeastern Brazil), Cantaure, Castillo  
890 (Northwestern Venezuela), and Castilletes (North Colombia) formations (early Miocene),  
891 with description of three new species. *Swiss J. Palaeontol.* 132:45–68.
- 892 Alfaro, M. E., F. Santini, C. D. Brock, H. Alamillo, A. Dornburg, D. L. Rabosky,  
893 G. Carnevale, and L. J. Harmon. 2009. Nine exceptional radiations plus high turnover  
894 explain species diversity in jawed vertebrates. *Proc. Natl. Acad. Sci. USA*  
895 106:13410–13414.
- 896 Ali, J. R. and M. Huber. 2010. Mammalian biodiversity on Madagascar controlled by ocean  
897 currents. *Nature* 463:653–656.
- 898 Angelis, K. and M. dos Reis. 2015. The impact of ancestral population size and incomplete  
899 lineage sorting on Bayesian estimation of species divergence times. *Curr. Zool.*  
900 61:874–885.

- 901 Bacon, C. D., P. Molnar, A. Antonelli, A. J. Crawford, C. Montes, and M. C.  
902 Vallejo-Pareja. 2016. Quaternary glaciation and the Great American Biotic Interchange.  
903 *Geology* 44:375–378.
- 904 Bacon, C. D., D. Silvestro, C. Jaramillo, B. T. Smith, P. Chakrabarty, and A. Antonelli.  
905 2015a. Biological evidence supports an early and complex emergence of the Isthmus of  
906 Panama. *Proc. Natl. Acad. Sci. USA* 112:6110–6115.
- 907 Bacon, C. D., D. Silvestro, C. Jaramillo, B. T. Smith, P. Chakrabarty, and A. Antonelli.  
908 2015b. Reply to Lessios and Marko et al.: Early and progressive migration across the  
909 Isthmus of Panama is robust to missing data and biases. *Proc. Natl. Acad. Sci. USA*  
910 112:E5767–E5768.
- 911 Berghoff, S. M., D. J. C. Kronauer, K. J. Edwards, and N. R. Franks. 2008. Dispersal and  
912 population structure of a New World predator, the army ant *Eciton burchellii*. *J. Evol.*  
913 *Biol.* 21:1125–1132.
- 914 Bermingham, E., S. S. McCafferty, and A. P. Martin. 1997. Fish biogeography and  
915 molecular clocks: perspectives from the Panamanian Isthmus. Pages 113–128 *in*  
916 *Molecular Systematics of Fishes* (T. D. Kocher and C. A. Stepien, eds.). Academic Press,  
917 San Diego, USA.
- 918 Betancur-R., R. 2009. Molecular phylogenetics and evolutionary history of ariid catfishes  
919 revisited: a comprehensive sampling. *BMC Evol. Biol.* 9:175.
- 920 Betancur-R., R. and A. Acero P. 2004. Description of *Notarius biffi* n. sp. and redescription  
921 of *N. insculptus* (Jordan and Gilbert) (Siluriformes: Ariidae) from the Eastern Pacific,  
922 with evidence of monophyly and limits of *Notarius*. *Zootaxa* 703:1–20.
- 923 Betancur-R., R., A. Acero P., E. Bermingham, and R. Cooke. 2007. Systematics and

- 924 biogeography of New World sea catfishes (Siluriformes: Ariidae) as inferred from  
925 mitochondrial, nuclear, and morphological evidence. *Mol. Phylogenet. Evol.* 45:339–357.
- 926 Betancur-R., R., A. P. Marceniuk, and P. Béarez. 2008. Taxonomic status and  
927 redescription of the Gillbacker sea catfish (Siluriformes: Ariidae: *Sciades parkeri*).  
928 *Copeia* 2008:827–834.
- 929 Betancur-R., R., G. Ortí, A. M. Stein, A. P. Marceniuk, and R. A. Pyron. 2012. Apparent  
930 signal of competition limiting diversification after ecological transitions from marine to  
931 freshwater habitats. *Ecol. Lett.* 15:822–830.
- 932 Bloch, J. I., E. D. Woodruff, A. R. Wood, A. F. Rincon, A. R. Harrington, G. S. Morgan,  
933 D. A. Foster, C. Montes, C. A. Jaramillo, N. A. Jud, D. S. Jones, and B. J. MacFadden.  
934 2016. First North American fossil monkey and early Miocene tropical biotic interchange.  
935 *Nature* 533:243–246.
- 936 Bouckaert, R. R. and J. Heled. 2014. DensiTree 2: seeing trees through the forest. bioRxiv  
937 preprint, doi: 10.1101/012401.
- 938 Bouckaert, R. R., J. Heled, D. Kühnert, T. Vaughan, C.-H. Wu, D. Xie, M. A. Suchard,  
939 A. Rambaut, and A. J. Drummond. 2014. BEAST 2: a software platform for Bayesian  
940 evolutionary analysis. *PLOS Comput. Biol.* 10:e1003537.
- 941 Brady, S. G., B. L. Fisher, T. R. Schultz, and P. S. Ward. 2014. The rise of army ants and  
942 their relatives: diversification of specialized predatory doryline ants. *BMC Evol. Biol.*  
943 14:93.
- 944 Bryant, D., R. R. Bouckaert, J. Felsenstein, N. A. Rosenberg, and A. RoyChoudhury. 2012.  
945 Inferring species trees directly from biallelic genetic markers: bypassing gene trees in a  
946 full coalescent analysis. *Mol. Biol. Evol.* 29:1917–1932.

- 947 Campbell, K. E., D. R. Prothero, L. Romero-Pittman, F. Hertel, and N. Rivera. 2010.  
948 Amazonian magnetostratigraphy: dating the first pulse of the Great American Faunal  
949 Interchange. *J. South Am. Earth Sci.* 29:619–626.
- 950 Carranza-Castañeda, O. and W. E. Miller. 2004. Late Tertiary terrestrial mammals from  
951 central Mexico and their relationship to South American immigrants. *Rev. Bras.*  
952 *Paleontolog.* 7:249–261.
- 953 Carrillo, J. D., A. Forasiepi, C. Jaramillo, and M. R. Sánchez-Villagra. 2015. Neotropical  
954 mammal diversity and the Great American Biotic Interchange: spatial and temporal  
955 variation in South America’s fossil record. *Front. Genet.* 5:451.
- 956 Catchen, J. M., A. Amores, P. Hohenlohe, W. Cresko, and J. H. Postlethwait. 2011. Stacks:  
957 building and genotyping loci de novo from short-read sequences. *G3* 1:171–182.
- 958 Cervigón, F., R. Cipriani, W. Fischer, L. Garibaldi, M. Hendrickx, A. J. Lemus, M. R.,  
959 J. M. Poutiers, G. Robaina, and B. Rodriguez. 1993. *Field Guide to the Commercial*  
960 *Marine and Brackish-water Resources of the Northern Coast of South America.* FAO,  
961 Rome, Italy.
- 962 Chifman, J. and L. Kubatko. 2014. Quartet inference from SNP data under the coalescent  
963 model. *Bioinformatics* 30:3317–3324.
- 964 Coates, A. G., L. S. Collins, M. P. Aubry, and W. A. Berggren. 2004. The Geology of the  
965 Darien, Panama, and the late Miocene-Pliocene collision of the Panama arc with  
966 northwestern South America. *Geol. Soc. Am. Bull.* 116:1327–1344.
- 967 Coates, A. G. and R. F. Stallard. 2013. How old is the Isthmus of Panama? *Bull. Mar. Sci.*  
968 89:801–813.

- 969 Cohen, K., S. Finney, P. Gibbard, and J.-X. Fan. 2013. The ICS International  
970 Chronostratigraphic Chart. *Episodes* 36: 199-204. Available from  
971 <http://www.stratigraphy.org/ICSchart/ChronostratChart2015-01.pdf>.
- 972 Collins, L. S., A. G. Coates, W. A. Berggren, M. P. Aubry, and J. Zhang. 1996. The late  
973 Miocene Panama isthmian strait. *Geology* 24:687–690.
- 974 Cooper, E. A. and J. A. C. Uy. 2017. Genomic evidence for convergent evolution of a key  
975 trait underlying divergence in island birds. *Mol. Ecol.* 26:3760–3774.
- 976 De Baets, K., A. Antonelli, and P. C. J. Donoghue. 2016. Tectonic blocks and molecular  
977 clocks. *Phil. Trans. R. Soc. B* 371:20160098.
- 978 De Maio, N., C.-H. Wu, K. M. O’Reilly, and D. Wilson. 2015. New routes to  
979 phylogeography: A Bayesian structured coalescent approximation. *PLOS Genet.*  
980 11:e1005421.
- 981 de Queiroz, A. 2014. *The Monkey’s Voyage: How Improbable Journeys Shaped the History*  
982 *of Life*. Basic Books, Perseus Books Group, New York, USA.
- 983 Demos, T. C., J. C. Kerbis Peterhans, T. A. Joseph, J. D. Robinson, B. Agwanda, and  
984 M. J. Hickerson. 2015. Comparative population genomics of African montane forest  
985 mammals support population persistence across a climatic gradient and Quaternary  
986 climatic cycles. *PLOS ONE* 10:e0131800.
- 987 Donaldson, K. A. and R. R. Wilson Jr. 1999. Amphi-Panamic geminates of snook  
988 (Percoidei: Centropomidae) provide a calibration of the divergence rate in the  
989 mitochondrial DNA control region of fishes. *Mol. Phylogenet. Evol.* 13:208–213.
- 990 Drummond, A. J. and R. R. Bouckaert. 2015. *Bayesian evolutionary analysis with BEAST*  
991 2. Cambridge University Press, Cambridge, UK.

- 992 Drummond, A. J., S. Y. W. Ho, M. J. Philips, and A. Rambaut. 2006. Relaxed  
993 phylogenetics and dating with confidence. *PLOS Biol.* 4:e88.
- 994 Drummond, A. J., G. K. Nicholls, A. G. Rodrigo, and W. Solomon. 2002. Estimating  
995 mutation parameters, population history and genealogy simultaneously from temporally  
996 spaced sequence data. *Genetics* 161:1307–1320.
- 997 Drummond, A. J., M. A. Suchard, D. Xie, and A. Rambaut. 2012. Bayesian phylogenetics  
998 with BEAUti and the BEAST 1.7. *Mol. Biol. Evol.* 29:1969–1973.
- 999 Eaton, D. A. R. 2014. PyRAD: assembly of de novo RADseq loci for phylogenetic analyses.  
1000 *Bioinformatics* 30:1844–1849.
- 1001 Edwards, S. V., Z. Xi, A. Janke, B. C. Faircloth, J. E. McCormack, T. C. Glenn, B. Zhong,  
1002 S. Wu, E. M. Lemmon, A. R. Lemmon, A. D. Leaché, L. Liu, and C. C. Davis. 2016.  
1003 Implementing and testing the multispecies coalescent model: A valuable paradigm for  
1004 phylogenomics. *Mol. Phylogenet. Evol.* 94:447–462.
- 1005 Farris, D. W., C. Jaramillo, G. Bayona, S. A. Restrepo-Moreno, C. Montes, A. Cardona,  
1006 A. Mora, R. J. Speakman, M. D. Glascock, and V. Valencia. 2011. Fracturing of the  
1007 Panamanian Isthmus during initial collision with South America. *Geology* 39:1007–1010.
- 1008 Flynn, J. J., B. J. Kowallis, C. Nuñez, O. Carranza-Castañeda, W. E. Miller, C. C.  
1009 Swisher, III, and E. Lindsay. 2005. Geochronology of Hemphillian-Blancan aged strata,  
1010 Guanajuato, Mexico, and implications for timing of the Great American Biotic  
1011 Interchange. *J. Geol.* 113:287–307.
- 1012 Frailey, C. D. and K. E. Campbell. 2012. Two new genera of peccaries (Mammalia,  
1013 Artiodactyla, Tayassuidae) from upper Miocene deposits of the Amazon Basin. *J.*  
1014 *Paleont.* 86:852–877.

- 1015 Gatesy, J. and M. S. Springer. 2013. Concatenation versus coalescence versus  
1016 “concatalescence”. *Proc. Natl. Acad. Sci. USA* 110:E1179–E1179.
- 1017 Gatesy, J. and M. S. Springer. 2014. Phylogenetic analysis at deep timescales: Unreliable  
1018 gene trees, bypassed hidden support, and the coalescence/concatalescence conundrum.  
1019 *Mol. Phylogenet. Evol.* 80:231–266.
- 1020 Gavryushkina, A., T. A. Heath, D. T. Ksepka, T. Stadler, D. Welch, and A. J. Drummond.  
1021 2017. Bayesian total-evidence dating reveals the recent crown radiation of penguins.  
1022 *Syst. Biol.* 66:57–73.
- 1023 Gavryushkina, A., D. Welch, T. Stadler, and A. J. Drummond. 2014. Bayesian inference of  
1024 sampled ancestor trees for epidemiology and fossil calibration. *PLOS Comput. Biol.*  
1025 10:e1003919.
- 1026 Gregory, T. 2016. Animal Genome Size Database. <http://www.genomesize.com>.
- 1027 Groeneveld, J., E. C. Hathorne, S. Steinke, H. DeBey, A. Mackensen, and R. Tiedemann.  
1028 2014. Glacial induced closure of the Panamanian Gateway during Marine Isotope Stages  
1029 (MIS) 95–100 (~2.5 Ma). *Earth Planet Sci. Lett.* 404:296–306.
- 1030 Hasegawa, M., H. Kishino, and T. Yano. 1985. Dating of the human-ape splitting by a  
1031 molecular clock of mitochondrial DNA. *J. Mol. Evol.* 22:160–174.
- 1032 Heath, T. A., J. P. Huelsenbeck, and T. Stadler. 2014. The fossilized birth-death process  
1033 for coherent calibration of divergence-time estimates. *Proc. Natl. Acad. Sci. USA*  
1034 111:E2957–E2966.
- 1035 Heled, J. and A. J. Drummond. 2010. Bayesian inference of species trees from multilocus  
1036 data. *Mol. Biol. Evol.* 27:570–580.

- 1037 Hickerson, M. J., E. Stahl, and H. A. Lessios. 2006. Test for simultaneous divergence using  
1038 approximate Bayesian computation. *Evolution* 60:2435–2453.
- 1039 Hirschfeld, S. E. 1968. Plio-Pleistocene megalonychid sloths of North America. *Bull.*  
1040 *Florida State Mus.* 12:213–296.
- 1041 Hobolth, A., O. F. Christensen, T. Mailund, and M. H. Schierup. 2007. Genomic  
1042 relationships and speciation times of human, chimpanzee, and gorilla inferred from a  
1043 coalescent hidden Markov model. *PLOS Genet.* 3:e7.
- 1044 Huang, J.-P. 2016. The great American biotic interchange and diversification history in  
1045 *Dynastes* beetles (Scarabaeidae; Dynastinae). *Zool. J. Linnean Soc.* 178:88–96.
- 1046 Huelsenbeck, J. P., R. Nielsen, and J. P. Bollback. 2003. Stochastic mapping of  
1047 morphological characters. *Syst. Biol.* 52:131–158.
- 1048 Jackson, J. and A. O’Dea. 2013. Timing of the oceanographic and biological isolation of  
1049 the Caribbean Sea from the tropical eastern Pacific Ocean. *Bull. Mar. Sci.* 89:779–800.
- 1050 Jukes, T. H. and C. R. Cantor. 1969. Evolution of protein molecules. Pages 21–132 *in*  
1051 *Mammalian Protein Metabolism* (H. N. Munro, ed.). Academic Press, New York.
- 1052 Kay, R. F. 2015. Biogeography in deep time – What do phylogenetics, geology, and  
1053 paleoclimate tell us about early platyrrhine evolution? *Mol. Phylogenet. Evol.*  
1054 82:358–374.
- 1055 Kubatko, L. S., B. C. Carstens, and L. L. Knowles. 2009. STEM: species tree estimation  
1056 using maximum likelihood for gene trees under coalescence. *Bioinformatics* 25:971–973.
- 1057 Kubatko, L. S. and J. H. Degnan. 2007. Inconsistency of phylogenetic estimates from  
1058 concatenated data under coalescence. *Syst. Biol.* 56:17–24.



- 1059 Kuhner, M. K., J. Yamato, and J. Felsenstein. 1998. Maximum likelihood estimation of  
1060 population growth rates based on the coalescent. *Genetics* 149:429–434.
- 1061 Lanier, H. C. and L. L. Knowles. 2012. Is recombination a problem for species-tree  
1062 analyses? *Syst. Biol.* 61:691–701.
- 1063 Laurito, C. A. and A. L. Valerio. 2012. Primer registro fósil de *Pliometanastes* sp.  
1064 (Mammalia, Xenarthra, Megalonychidae) para el Mioceno Superior de Costa Rica,  
1065 América Central. Una nueva pista en la comprensión del Pre-GABI. *Rev. Geol. Amér.*  
1066 *Central* 47:95–108.
- 1067 Leaché, A. D. and J. R. Oaks. 2017. The utility of single nucleotide polymorphism (SNP)  
1068 data in phylogenetics. *Annu. Rev. Ecol. Evol. Syst.* 48:69–84.
- 1069 Lessios, H. A. 2008. The great American schism: divergence of marine organisms after the  
1070 rise of the Central American Isthmus. *Annu. Rev. Ecol. Evol. Syst.* 39:63–91.
- 1071 Linkem, C. W., V. N. Minin, and A. D. Leaché. 2016. Detecting the anomaly zone in  
1072 species trees and evidence for a misleading signal in higher-level skink phylogeny  
1073 (Squamata: Scincidae). *Syst. Biol.* 65:465–477.
- 1074 Lischer, H. E. L., L. Excoffier, and G. Heckel. 2014. Ignoring heterozygous sites biases  
1075 phylogenomic estimates of divergence times: implications for the evolutionary history of  
1076 *Microtus* voles. *Mol. Biol. Evol.* 31:817–831.
- 1077 Liu, L. 2008. BEST: Bayesian estimation of species trees under the coalescent model.  
1078 *Bioinformatics* 24:2542–2543.
- 1079 Liu, L., L. Yu, and S. V. Edwards. 2010. A maximum pseudo-likelihood approach for  
1080 estimating species trees under the coalescent. *BMC Evol. Biol.* 10:302.

- 1081 Lozier, J. D., J. M. Jackson, M. E. Dillon, and J. P. Strange. 2016. Population genomics of  
1082 divergence among extreme and intermediate color forms in a polymorphic insect. *Ecol.*  
1083 *Evol.* 6:1075–1091.
- 1084 Maddison, W. P. 1997. Gene trees in species trees. *Syst. Biol.* 46:523–536.
- 1085 Marceniuk, A. P., R. Betancur-R., A. Acero P., and J. Muriel-Cunha. 2012a. Review of the  
1086 genus *Cathorops* (Siluriformes: Ariidae) from the Caribbean and Atlantic South  
1087 America, with description of a new species. *Copeia* 2012:77–97.
- 1088 Marceniuk, A. P., N. A. Menezes, and M. R. Britto. 2012b. Phylogenetic analysis of the  
1089 family Ariidae (Ostariophysi: Siluriformes), with a hypothesis on the monophyly and  
1090 relationships of the genera. *Zool. J. Linnean Soc.* 165:534–669.
- 1091 Marshall, L. G. 1988. Land mammals and the Great American Interchange. *Am. Sci.*  
1092 76:380–388.
- 1093 Matschiner, M., Z. Musilová, J. M. I. Barth, Z. Starostová, W. Salzburger, M. Steel, and  
1094 R. R. Bouckaert. 2017. Bayesian phylogenetic estimation of clade ages supports  
1095 trans-Atlantic dispersal of cichlid fishes. *Syst. Biol.* 66:3–22.
- 1096 McCormack, J. E., J. Heled, K. S. Delaney, A. T. Peterson, and L. L. Knowles. 2011.  
1097 Calibrating divergence times on species trees versus gene trees: implications for  
1098 speciation history of *Aphelocoma* jays. *Evolution* 65:184–202.
- 1099 Mendes, F. K. and M. W. Hahn. 2016. Gene tree discordance causes apparent substitution  
1100 rate variation. *Syst. Biol.* 65:711–721.
- 1101 Meunier, F. J. 2012. Skeletochronological studies of cyclical growth of freshwater fishes in  
1102 French Guiana. A review. *Cybium* 36:55–62.

- 1103 Meyer, B. S., M. Matschiner, and W. Salzburger. 2017. Disentangling incomplete lineage  
1104 sorting and introgression to refine species-tree estimates for Lake Tanganyika cichlid  
1105 fishes. *Syst. Biol.* 66:531–550.
- 1106 Mirarab, S. and T. Warnow. 2015. ASTRAL-II: coalescent-based species tree estimation  
1107 with many hundreds of taxa and thousands of genes. *Bioinformatics* 31:i44–52.
- 1108 Montes, C., G. Bayona, A. Cardona, D. M. Buchs, C. A. Silva, S. Morón, N. Hoyos, D. A.  
1109 Ramirez, C. A. Jaramillo, and V. Valencia. 2012. Arc-continent collision and orocline  
1110 formation: Closing of the Central American seaway. *J. Geophys. Res.* 117:B04105.
- 1111 Montes, C., A. Cardona, C. Jaramillo, A. Pardo, J. C. Silva, V. Valencia, C. Ayala, L. C.  
1112 Pérez-Angel, L. A. Rodriguez-Parra, V. Ramirez, and H. Niño. 2015. Middle Miocene  
1113 closure of the Central American Seaway. *Science* 348:226–229.
- 1114 Musilová, Z., O. Říčan, K. Janko, and J. Novák. 2008. Molecular phylogeny and  
1115 biogeography of the Neotropical cichlid fish tribe Cichlasomatini (Teleostei: Cichlidae:  
1116 Cichlasomatinae). *Mol. Phylogenet. Evol.* 46:659–672.
- 1117 O’Dea, A., H. A. Lessios, A. G. Coates, R. I. Eytan, S. A. Restrepo-Moreno, A. L. Cione,  
1118 L. S. Collins, A. de Queiroz, D. W. Farris, R. D. Norris, R. F. Stallard, M. O.  
1119 Woodburne, O. Aguilera, M.-P. Aubry, W. A. Berggren, A. F. Budd, M. A. Cozzuol,  
1120 S. E. Coppard, H. Duque-Caro, S. Finnegan, G. M. Gasparini, E. L. Grossman, K. G.  
1121 Johnson, L. D. Keigwin, N. Knowlton, E. G. Leigh, J. S. Leonard-Pingel, P. B. Marko,  
1122 N. D. Pyenson, P. G. Rachello-Dolmen, E. Soibelzon, L. Soibelzon, J. A. Todd, G. J.  
1123 Vermeij, and J. B. C. Jackson. 2016. Formation of the Isthmus of Panama. *Sci. Adv.*  
1124 2:e1600883.
- 1125 Ogilvie, H. A., R. R. Bouckaert, and A. J. Drummond. 2017. StarBEAST2 brings faster

- 1126 species tree inference and accurate estimates of substitution rates. *Mol. Biol. Evol.*  
1127 34:2101–2114.
- 1128 Ogilvie, H. A., J. Heled, D. Xie, and A. J. Drummond. 2016. Computational performance  
1129 and statistical accuracy of \*BEAST and comparisons with other methods. *Syst. Biol.*  
1130 65:381–396.
- 1131 O’Reilly, J. E., M. dos Reis, and P. C. J. Donoghue. 2015. Dating tips for divergence-time  
1132 estimation. *Trends Genet.* 31:637–650.
- 1133 Osborne, A. H., D. R. Newkirk, J. Groeneveld, E. E. Martin, R. Tiedemann, and  
1134 M. Frank. 2014. The seawater neodymium and lead isotope record of the final stages of  
1135 Central American Seaway closure. *Paleoceanography* 29:715–729.
- 1136 Portik, D. M., A. D. Leaché, D. Rivera, M. F. Barej, M. Burger, M. Hirschfeld, M.-O.  
1137 Rödel, D. C. Blackburn, and M. K. Fujita. 2017. Evaluating mechanisms of  
1138 diversification in a Guineo-Congolian tropical forest frog using demographic model  
1139 selection. *Mol. Ecol.* 26:5245–5263.
- 1140 Prothero, D. R., K. E. Campbell, Jr, B. L. Beatty, and C. D. Frailey. 2014. New late  
1141 Miocene dromomerycine artiodactyl from the Amazon Basin: implications for  
1142 interchange dynamics. *J. Paleont.* 88:434–443.
- 1143 Rabosky, D. L., F. Santini, J. Eastman, S. A. Smith, B. Sidlauskas, J. Chang, and M. E.  
1144 Alfaro. 2013. Rates of speciation and morphological evolution are correlated across the  
1145 largest vertebrate radiation. *Nat. Commun.* 4:1958.
- 1146 Rambaut, A. and N. C. Grassly. 1997. Seq-Gen: an application for the Monte Carlo  
1147 simulation of DNA sequence evolution along phylogenetic trees. *Comput. Appl. Biosci.*  
1148 13:235–238.

- 1149 Rambaut, A., M. Suchard, D. Xie, and A. Drummond. 2014. Tracer v1.6. Available from  
1150 <http://beast.bio.ed.ac.uk/Tracer>.
- 1151 Rannala, B. and Z. Yang. 2003. Bayes estimation of species divergence times and ancestral  
1152 population sizes using DNA sequences from multiple loci. *Genetics* 164:1645–1656.
- 1153 Revell, L. J. 2012. phytools: an R package for phylogenetic comparative biology (and other  
1154 things). *Method Ecol. Evol.* 3:217–223.
- 1155 Roch, S. and M. Steel. 2014. Likelihood-based tree reconstruction on a concatenation of  
1156 aligned sequence data sets can be statistically inconsistent. *Theor. Popul. Biol.*  
1157 100:56–62.
- 1158 Roesti, M., A. P. Hendry, W. Salzburger, and D. Berner. 2012. Genome divergence during  
1159 evolutionary diversification as revealed in replicate lake-stream stickleback population  
1160 pairs. *Mol. Ecol.* 21:2852–2862.
- 1161 Ronquist, F., S. Klopfstein, L. Vilhelmsen, S. Schulmeister, D. L. Murray, and A. P.  
1162 Rasnitsyn. 2012. A total-evidence approach to dating with fossils, applied to the early  
1163 radiation of the Hymenoptera. *Syst. Biol.* 61:973–999.
- 1164 RoyChoudhury, A. and E. A. Thompson. 2012. Ascertainment correction for a population  
1165 tree via a pruning algorithm for likelihood computation. *Theor. Popul. Biol.* 82:59–65.
- 1166 Ru, D., K. Mao, L. Zhang, X. Wang, Z. Lu, and Y. Sun. 2016. Genomic evidence for  
1167 polyphyletic origins and interlineage gene flow within complex taxa: a case study of  
1168 *Picea brachytyla* in the Qinghai-Tibet Plateau. *Mol. Ecol.* 25:2373–2386.
- 1169 Sanderson, M. J. 2002. Estimating absolute rates of molecular evolution and divergence  
1170 times: a penalized likelihood approach. *Mol. Biol. Evol.* 19:101–109.

- 1171 Savin, S. M. and R. G. Douglas. 1985. Sea level, climate, and the Central American land  
1172 bridge. Pages 303–324 *in* The Great American Biotic Interchange (F. G. Stehli and S. D.  
1173 Webb, eds.). Plenum Press, New York, USA.
- 1174 Scally, A., J. Y. Dutheil, L. W. Hillier, G. E. Jordan, I. Goodhead, J. Herrero, A. Hobolth,  
1175 T. Lappalainen, T. Mailund, T. Marquès-Bonet, S. McCarthy, S. H. Montgomery, P. C.  
1176 Schwalie, Y. A. Tang, M. C. Ward, Y. Xue, B. Yngvadottir, C. Alkan, L. N. Andersen,  
1177 Q. Ayub, E. V. Ball, K. Beal, B. J. Bradley, Y. Chen, C. M. Clee, S. Fitzgerald, T. A.  
1178 Graves, Y. Gu, P. Heath, A. Heger, E. Karakoc, A. Kolb-Kokocinski, G. K. Laird,  
1179 G. Lunter, S. Meader, M. Mort, J. C. Mullikin, K. Munch, T. D. O'Connor, A. D.  
1180 Phillips, J. Prado-Martinez, A. S. Rogers, S. Sajjadian, D. Schmidt, K. Shaw, J. T.  
1181 Simpson, P. D. Stenson, D. J. Turner, L. Vigilant, A. J. Vilella, W. Whitener, B. Zhu,  
1182 D. N. Cooper, P. de Jong, E. T. Dermitzakis, E. E. Eichler, P. Flicek, N. Goldman, N. I.  
1183 Mundy, Z. Ning, D. T. Odom, C. P. Ponting, M. A. Quail, O. A. Ryder, S. M. Searle,  
1184 W. C. Warren, R. K. Wilson, M. H. Schierup, J. Rogers, C. Tyler-Smith, and R. Durbin.  
1185 2012. Insights into hominid evolution from the gorilla genome sequence. *Nature*  
1186 483:169–175.
- 1187 Schultz, L. P. 1944. The catfishes of Venezuela, with descriptions of thirty-eight new forms.  
1188 *Proceedings of the United States National Museum* 94:173–338.
- 1189 Scornavacca, C. and N. Galtier. 2017. Incomplete lineage sorting in mammalian  
1190 phylogenomics. *Syst. Biol.* 66:112–120.
- 1191 Sepulchre, P., T. Arsouze, Y. Donnadiou, C. Jaramillo, J. Le Bras, E. Martin, C. Montes,  
1192 and A. J. Waite. 2014. Consequences of shoaling of the Central American Seaway  
1193 determined from modeling Nd isotopes. *Paleoceanography* 29:176–189.

- 1194 Springer, M. S. and J. Gatesy. 2016. The gene tree delusion. *Mol. Phylogenet. Evol.*  
1195 94:1–33.
- 1196 Stange, M., G. Aguirre-Fernández, R. G. Cooke, T. Barros, W. Salzburger, and M. R.  
1197 Sánchez-Villagra. 2016. Evolution of opercle bone shape along a macrohabitat gradient:  
1198 species identification using mtDNA and geometric morphometric analyses in neotropical  
1199 sea catfishes (Ariidae). *Ecol. Evol.* 6:5817–5830.
- 1200 Suh, A., L. Smeds, and H. Ellegren. 2015. The dynamics of incomplete lineage sorting  
1201 across the ancient adaptive radiation of Neoavian birds. *PLOS Biol.* 13:e1002224.
- 1202 Sukumaran, J. and M. T. Holder. 2010. DendroPy: a Python library for phylogenetic  
1203 computing. *Bioinformatics* 26:1569–1571.
- 1204 Tavaré, S. 1986. Some probabilistic and statistical problems in the analysis of DNA  
1205 sequences. *Lectures on Mathematics in the Life Sciences* 17:57–86.
- 1206 Winston, M. E., D. J. C. Kronauer, and C. S. Moreau. 2017. Early and dynamic  
1207 colonization of Central America drives speciation in Neotropical army ants. *Mol. Ecol.*  
1208 26:859–870.
- 1209 Woodburne, M. O. 2010. The Great American Biotic Interchange: dispersals, tectonics,  
1210 climate, sea level and holding pens. *J. Mamm. Evol.* 17:245–264.
- 1211 Yule, G. U. 1925. A mathematical theory of evolution, based on the conclusions of Dr. J.  
1212 C. Willis, F.R.S. *Phil. Trans. R. Soc. B* 213:21–87.
